# Supplementary material
Source: PubMed Central journal article supplement (PMC5089913)
Supplement: NIHMS804322-supplement-Supp_Info.pdf [file NIHMS804322-supplement-Supp_Info.pdf]

Figure S1. Multi-locus species phylogeny for the a) X-linked loci and b) autosomal loci. Posterior probabilities are mapped onto the branches, and the node bars represent the 95% highest posterior density for the node height. For the X-linked tree, *D. neotestacea* sequences were split into ST and SR.

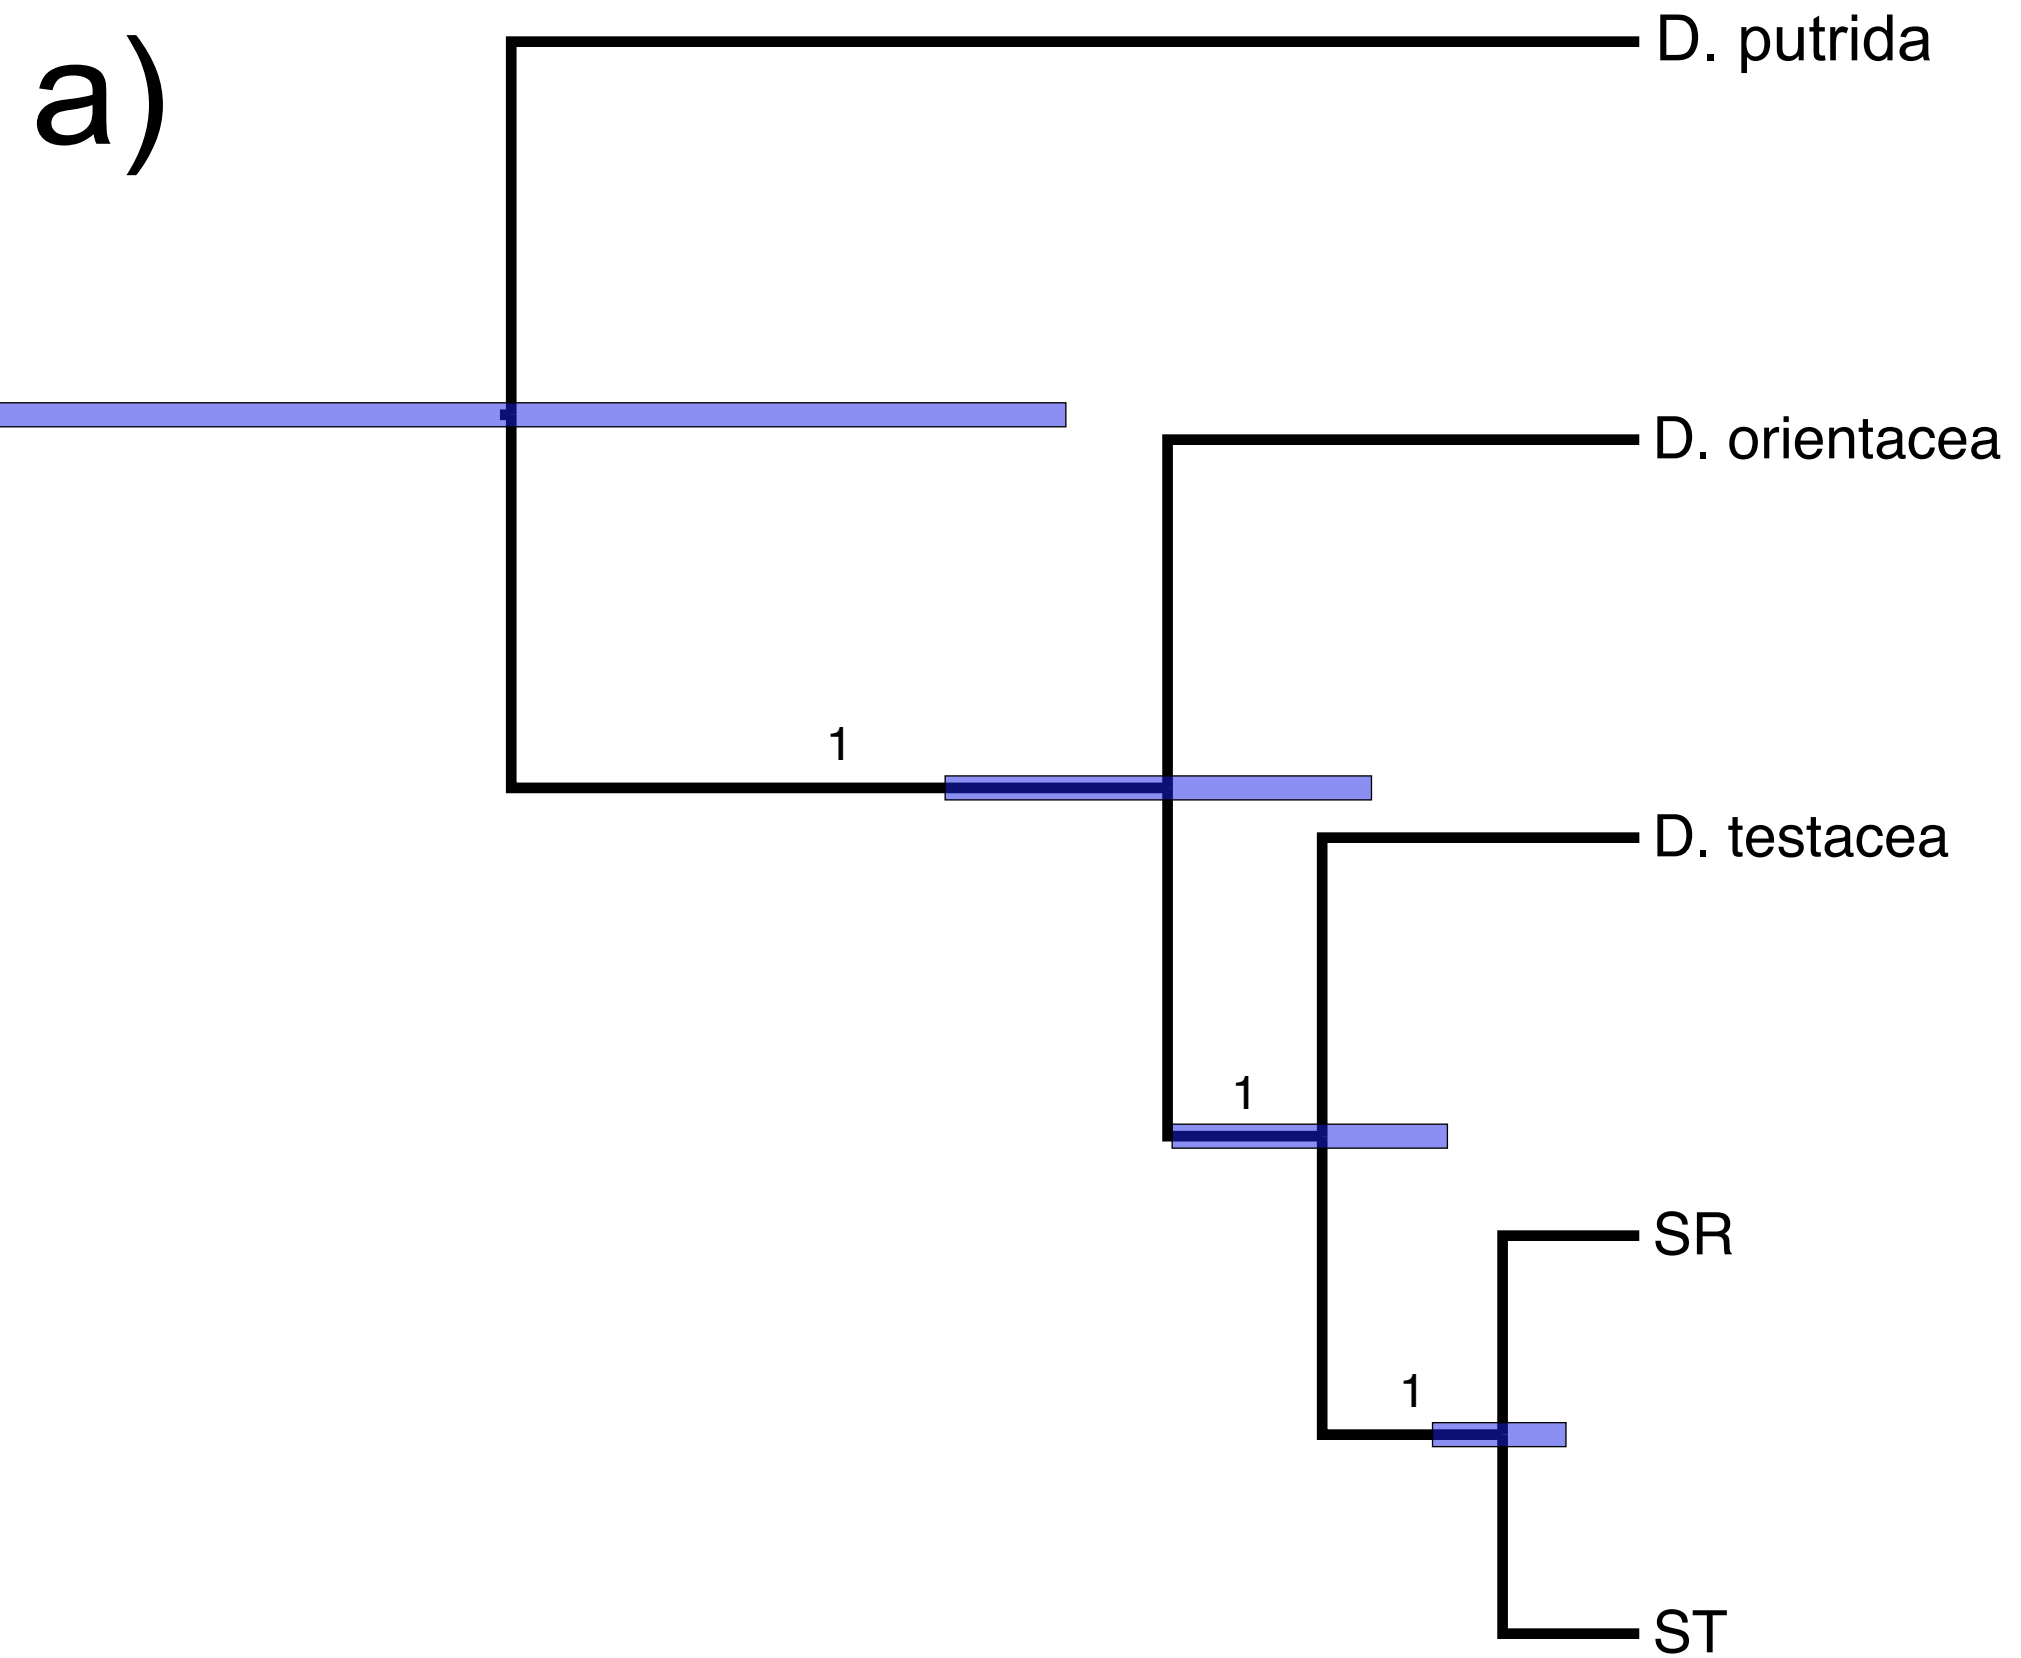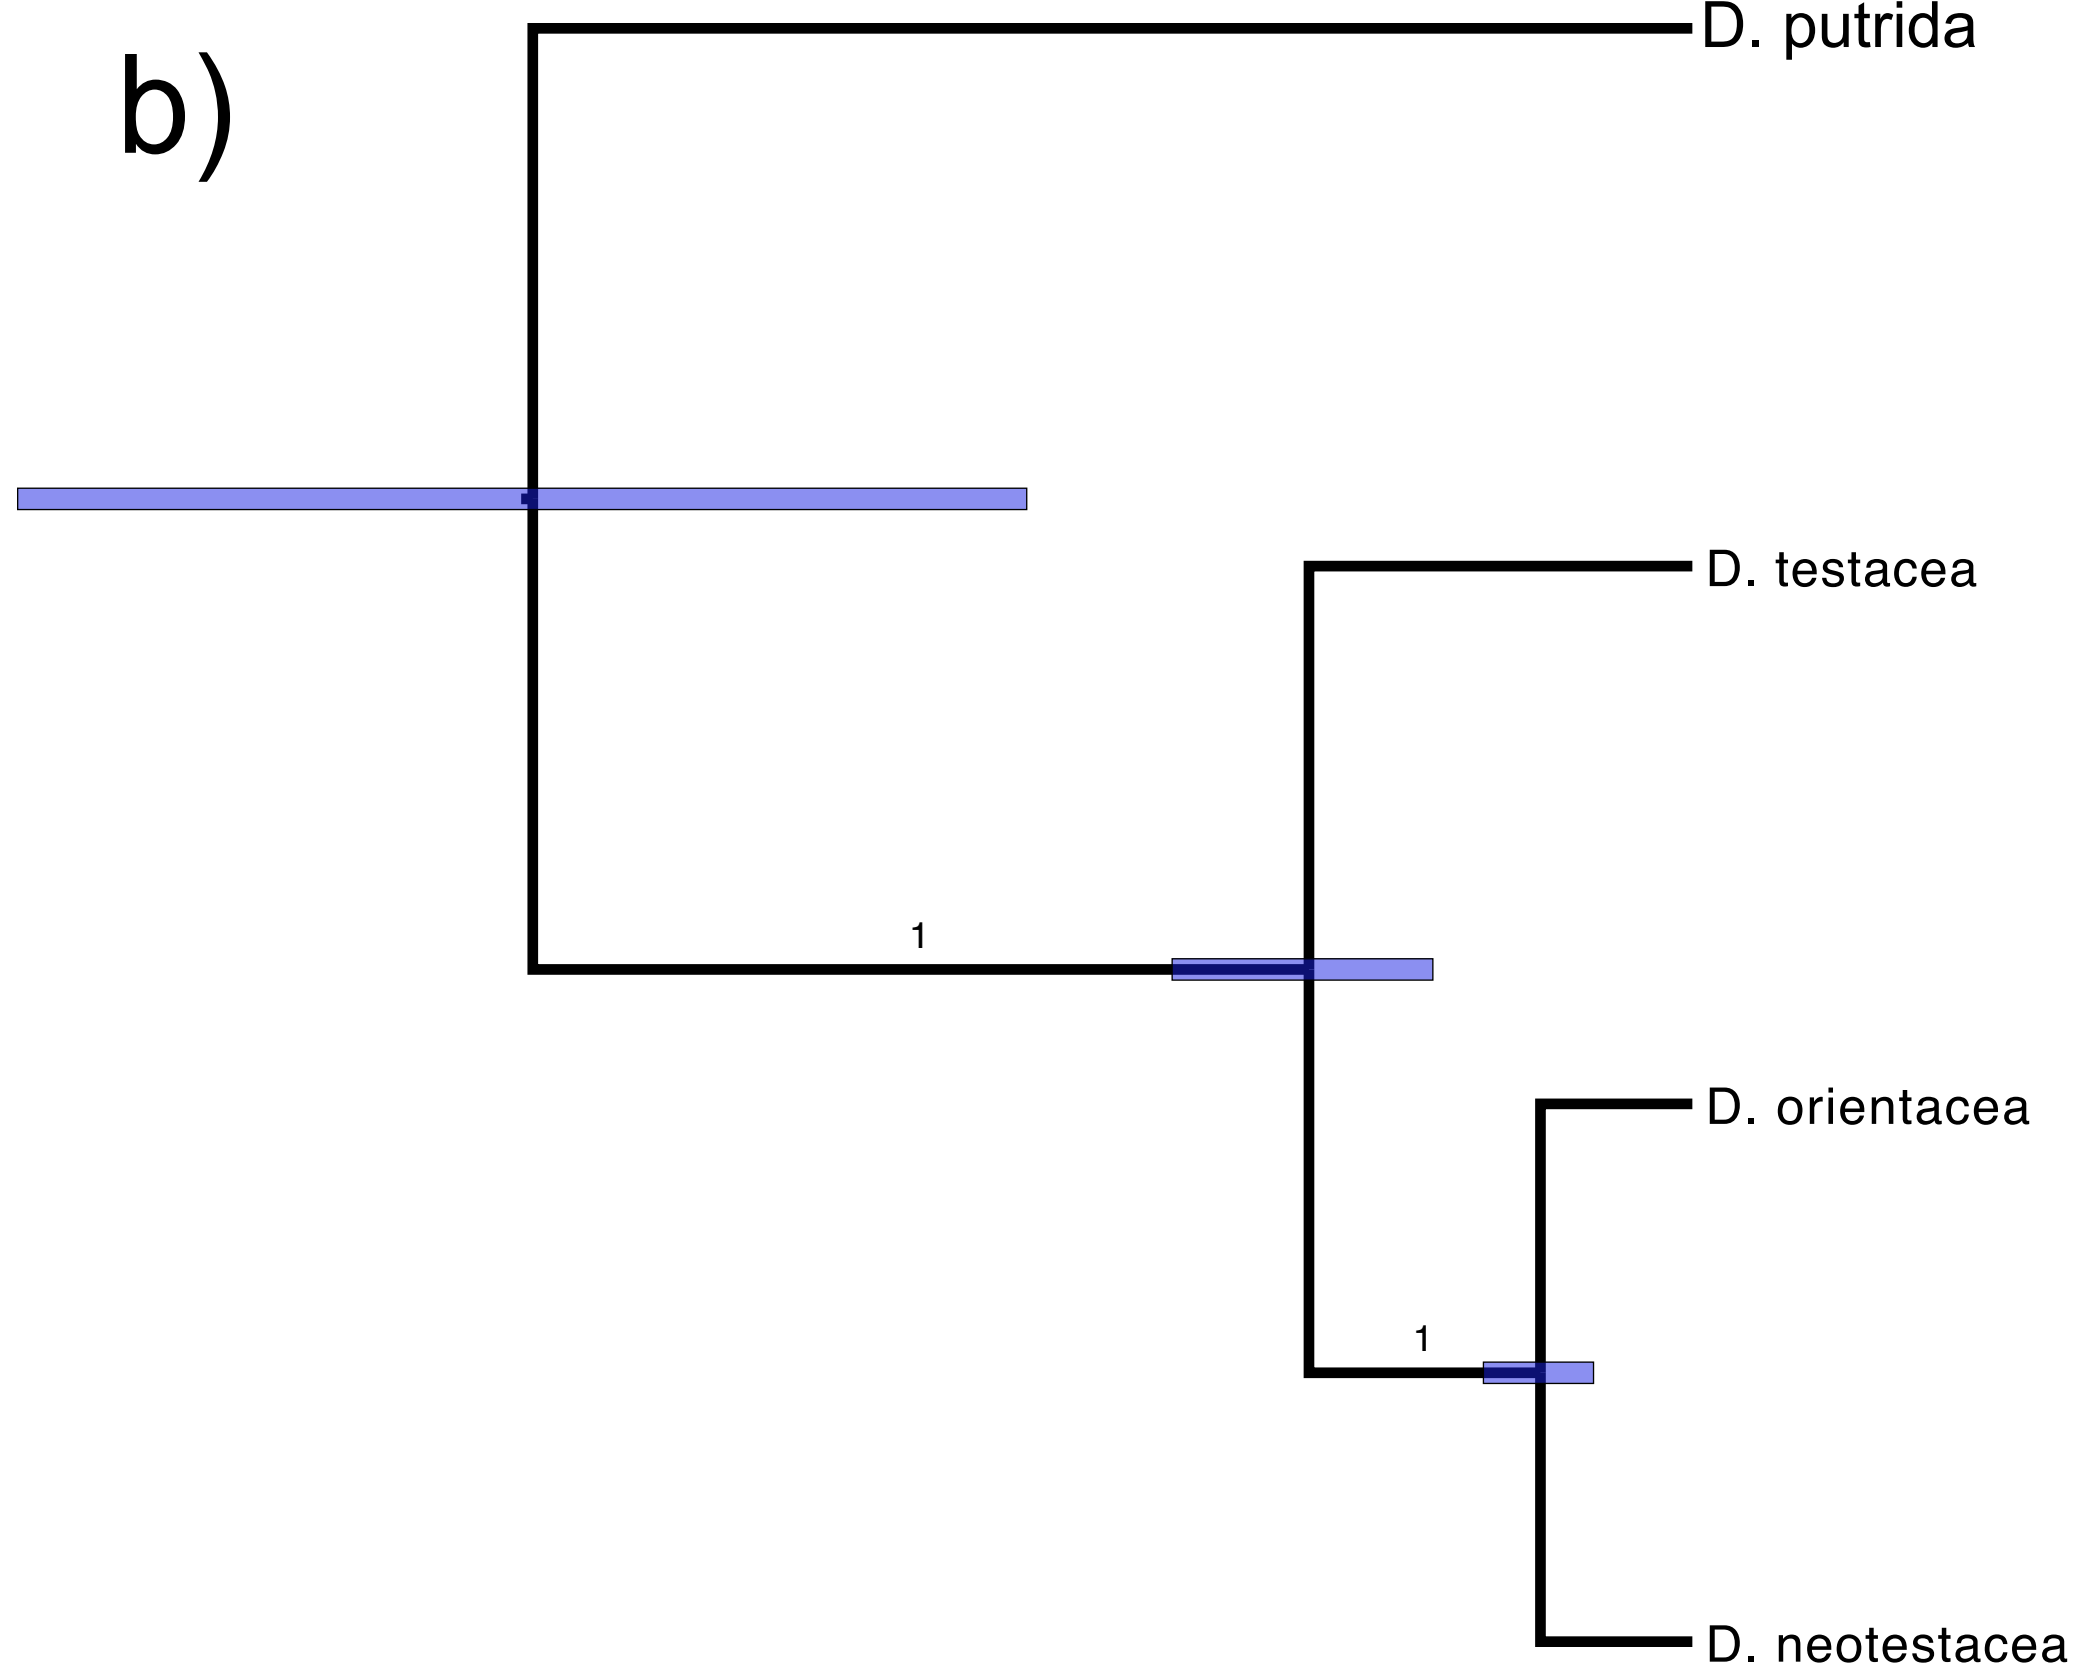

Figure S2. Individual gene trees. Trees were built in \*BEAST (see Methods), and the posterior probabilities greater than 0.75 are mapped onto branches. Individual branches are labeled with population or province of origin (Table S1) and X-chromosome type. SR samples are noted in red text, ST samples are black, and outgroup samples are blue.

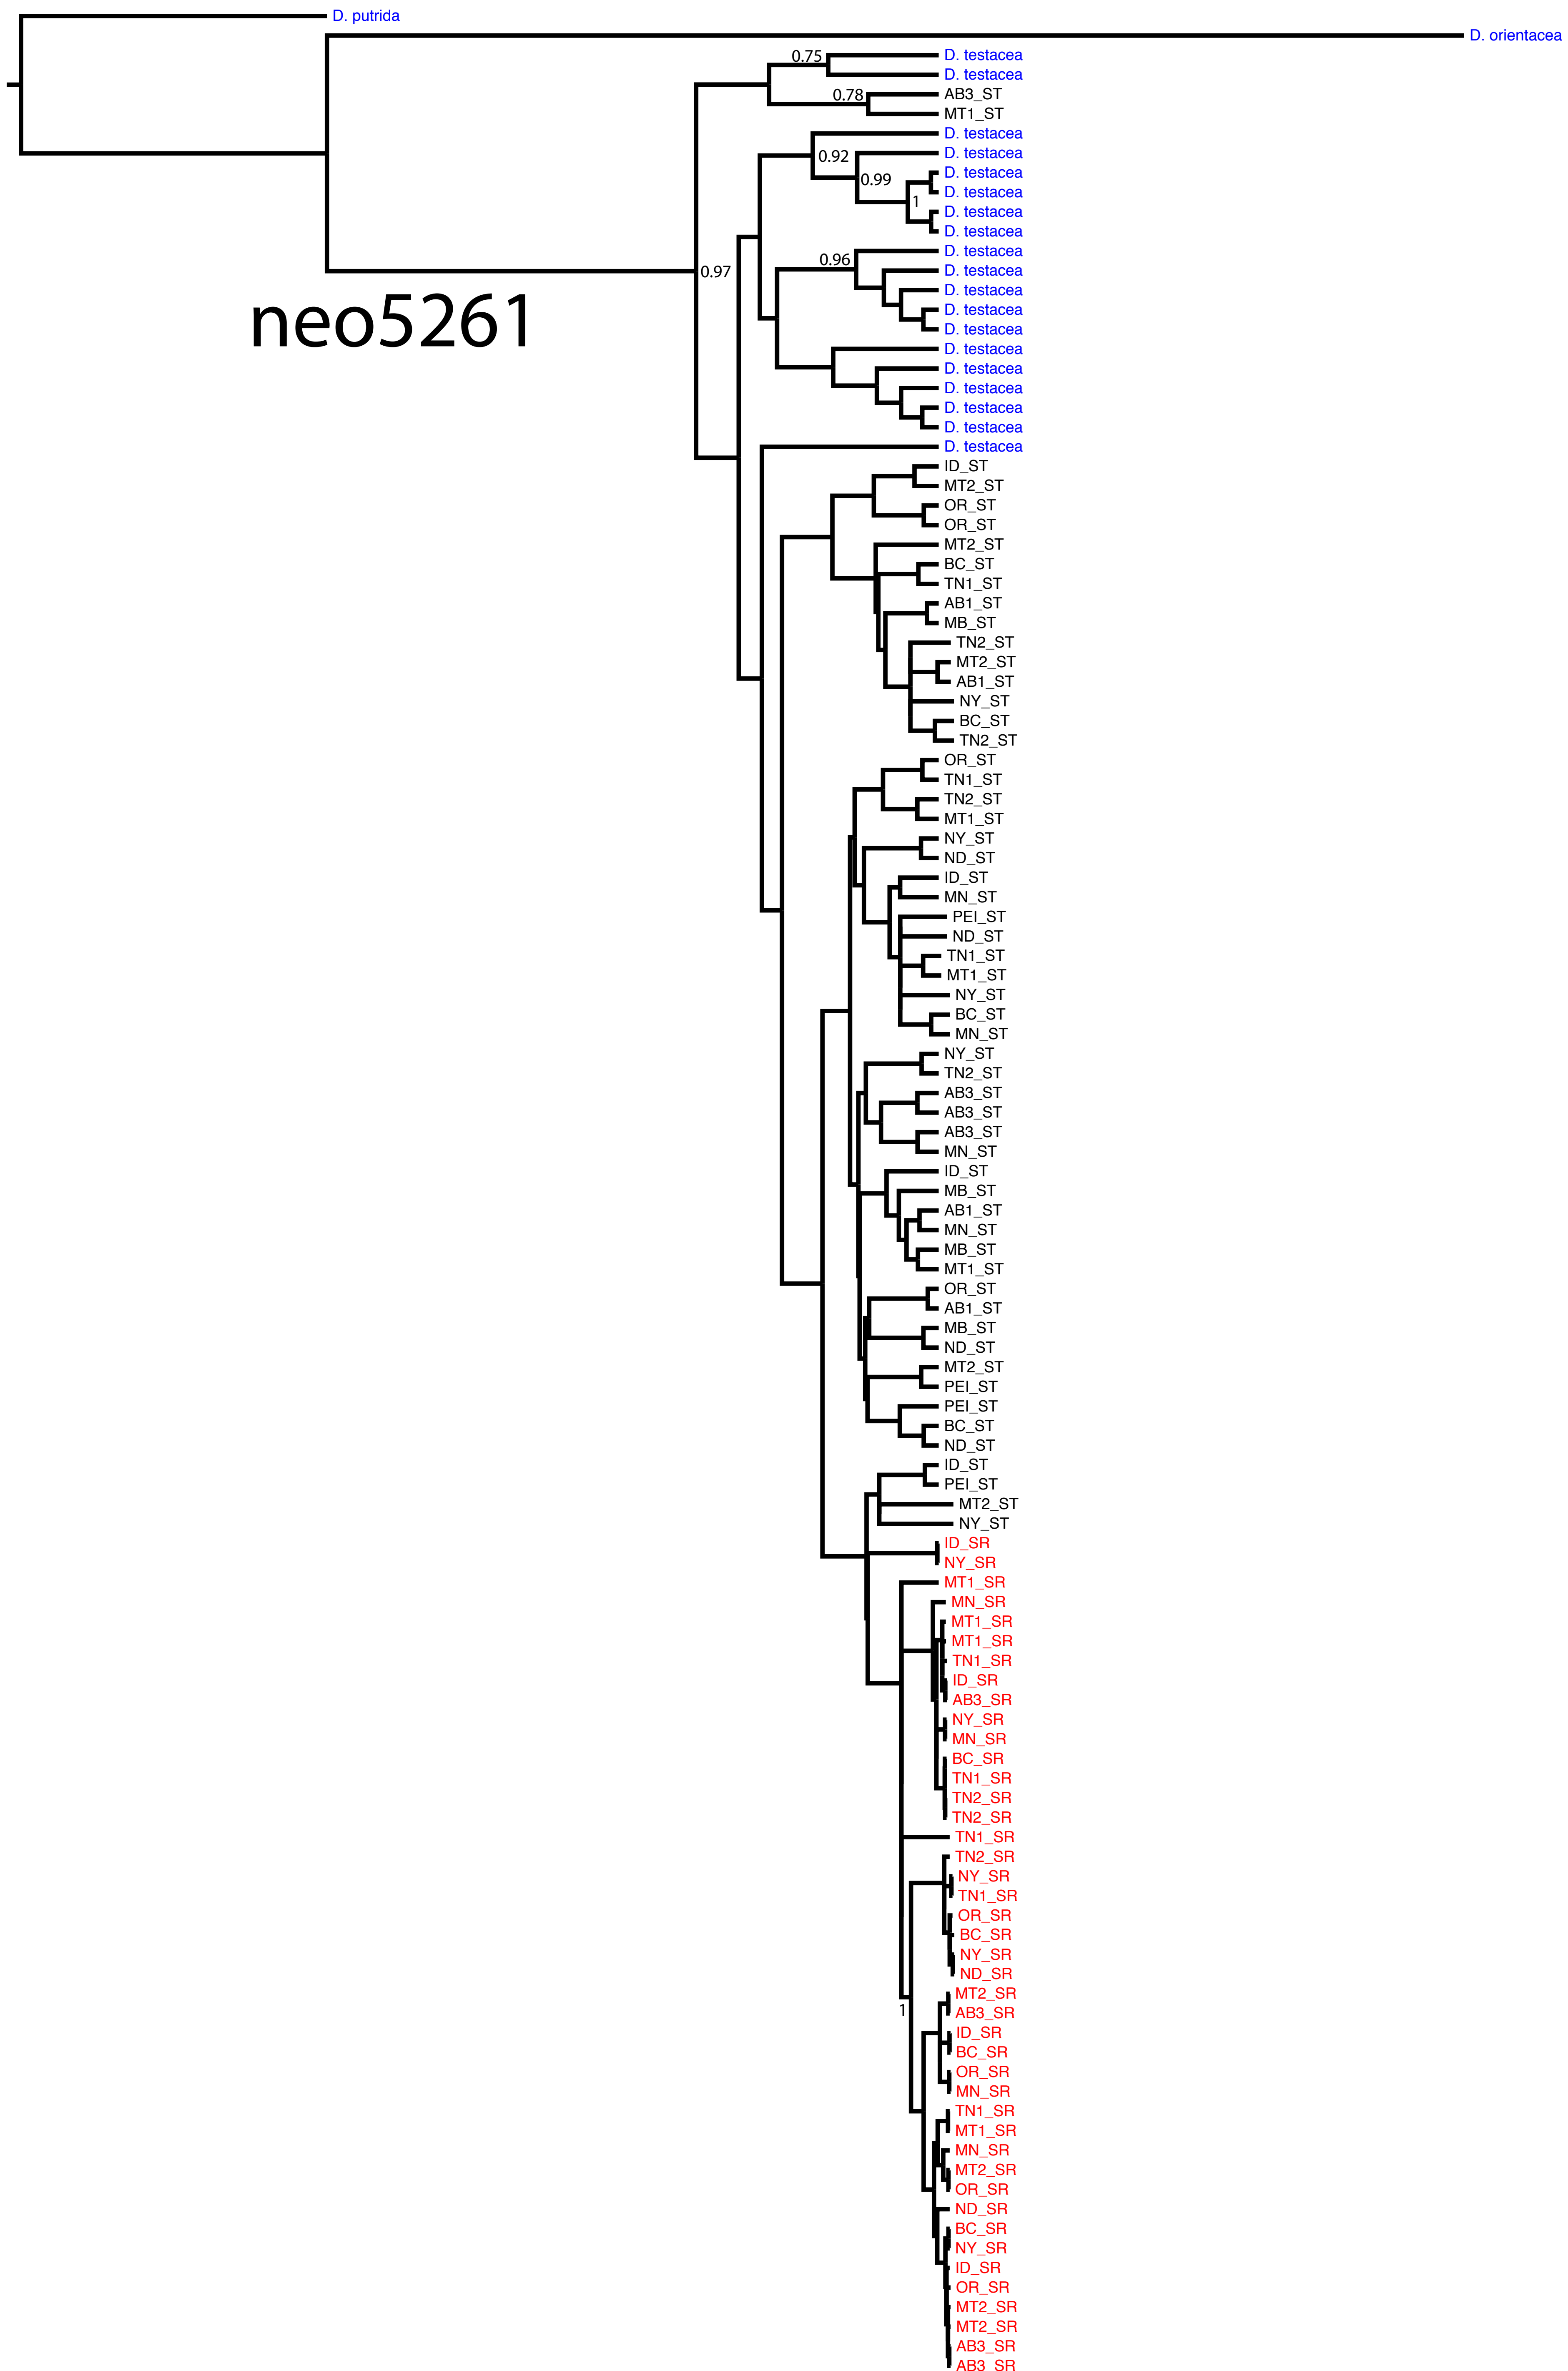

D. putrida

1

# neo6002

1

0.86

D. orientacea  
 D. testacea  
 D. testacea

1

ND\_SR  
 NY\_SR  
 MB\_ST  
 NY\_ST  
 BC\_ST  
 PEI\_ST  
 AB1\_ST  
 NY\_ST  
 MB\_ST  
 MN\_ST  
 AB1\_ST  
 TN2\_ST  
 AB3\_ST  
 TN1\_ST  
 PEI\_ST  
 PEI\_ST  
 MB\_ST  
 OR\_ST  
 TN1\_ST  
 PEI\_ST  
 TN2\_ST  
 OR\_ST  
 TN2\_ST  
 AB3\_ST

D. testacea  
 D. testacea

TN1\_ST  
 AB3\_ST  
 0.99 TN1\_SR  
 MT2\_SR

0.98

BC\_ST  
 OR\_ST  
 MT1\_ST  
 ID\_ST  
 MT1\_ST  
 ID\_ST  
 MT1\_ST  
 MT2\_ST  
 MN\_ST  
 BC\_ST

0.94

MB\_ST  
 ND\_ST  
 ND\_ST

0.87

NY\_ST  
 NY\_ST  
 BC\_ST  
 NY\_ST  
 MN\_ST  
 MT2\_ST

MN\_ST  
 ND\_ST  
 MT2\_ST  
 AB1\_ST  
 MT2\_ST  
 AB3\_ST  
 ID\_ST  
 AB1\_ST  
 OR\_ST  
 MT1\_ST  
 MT2\_ST

0.97

ND\_ST  
 ID\_ST  
 TN2\_ST  
 MT2\_SR  
 TN1\_SR  
 NY\_SR  
 TN1\_SR  
 OR\_SR  
 AB3\_SR  
 TN1\_SR  
 MT1\_SR

MT1\_SR  
 AB3\_SR  
 TN1\_SR  
 TN1\_SR  
 ID\_SR  
 ID\_SR  
 OR\_SR  
 BC\_SR  
 NY\_SR  
 TN2\_SR  
 MT2\_SR  
 MN\_SR  
 MN\_SR  
 MN\_SR

MT1\_SR  
 NY\_SR  
 ID\_SR  
 TN2\_SR  
 OR\_SR  
 MN\_SR  
 BC\_SR  
 MT2\_SR  
 BC\_SR  
 AB3\_SR  
 ID\_SR  
 AB3\_SR  
 ND\_SR  
 TN2\_SR  
 OR\_SR  
 BC\_SR  
 NY\_SR

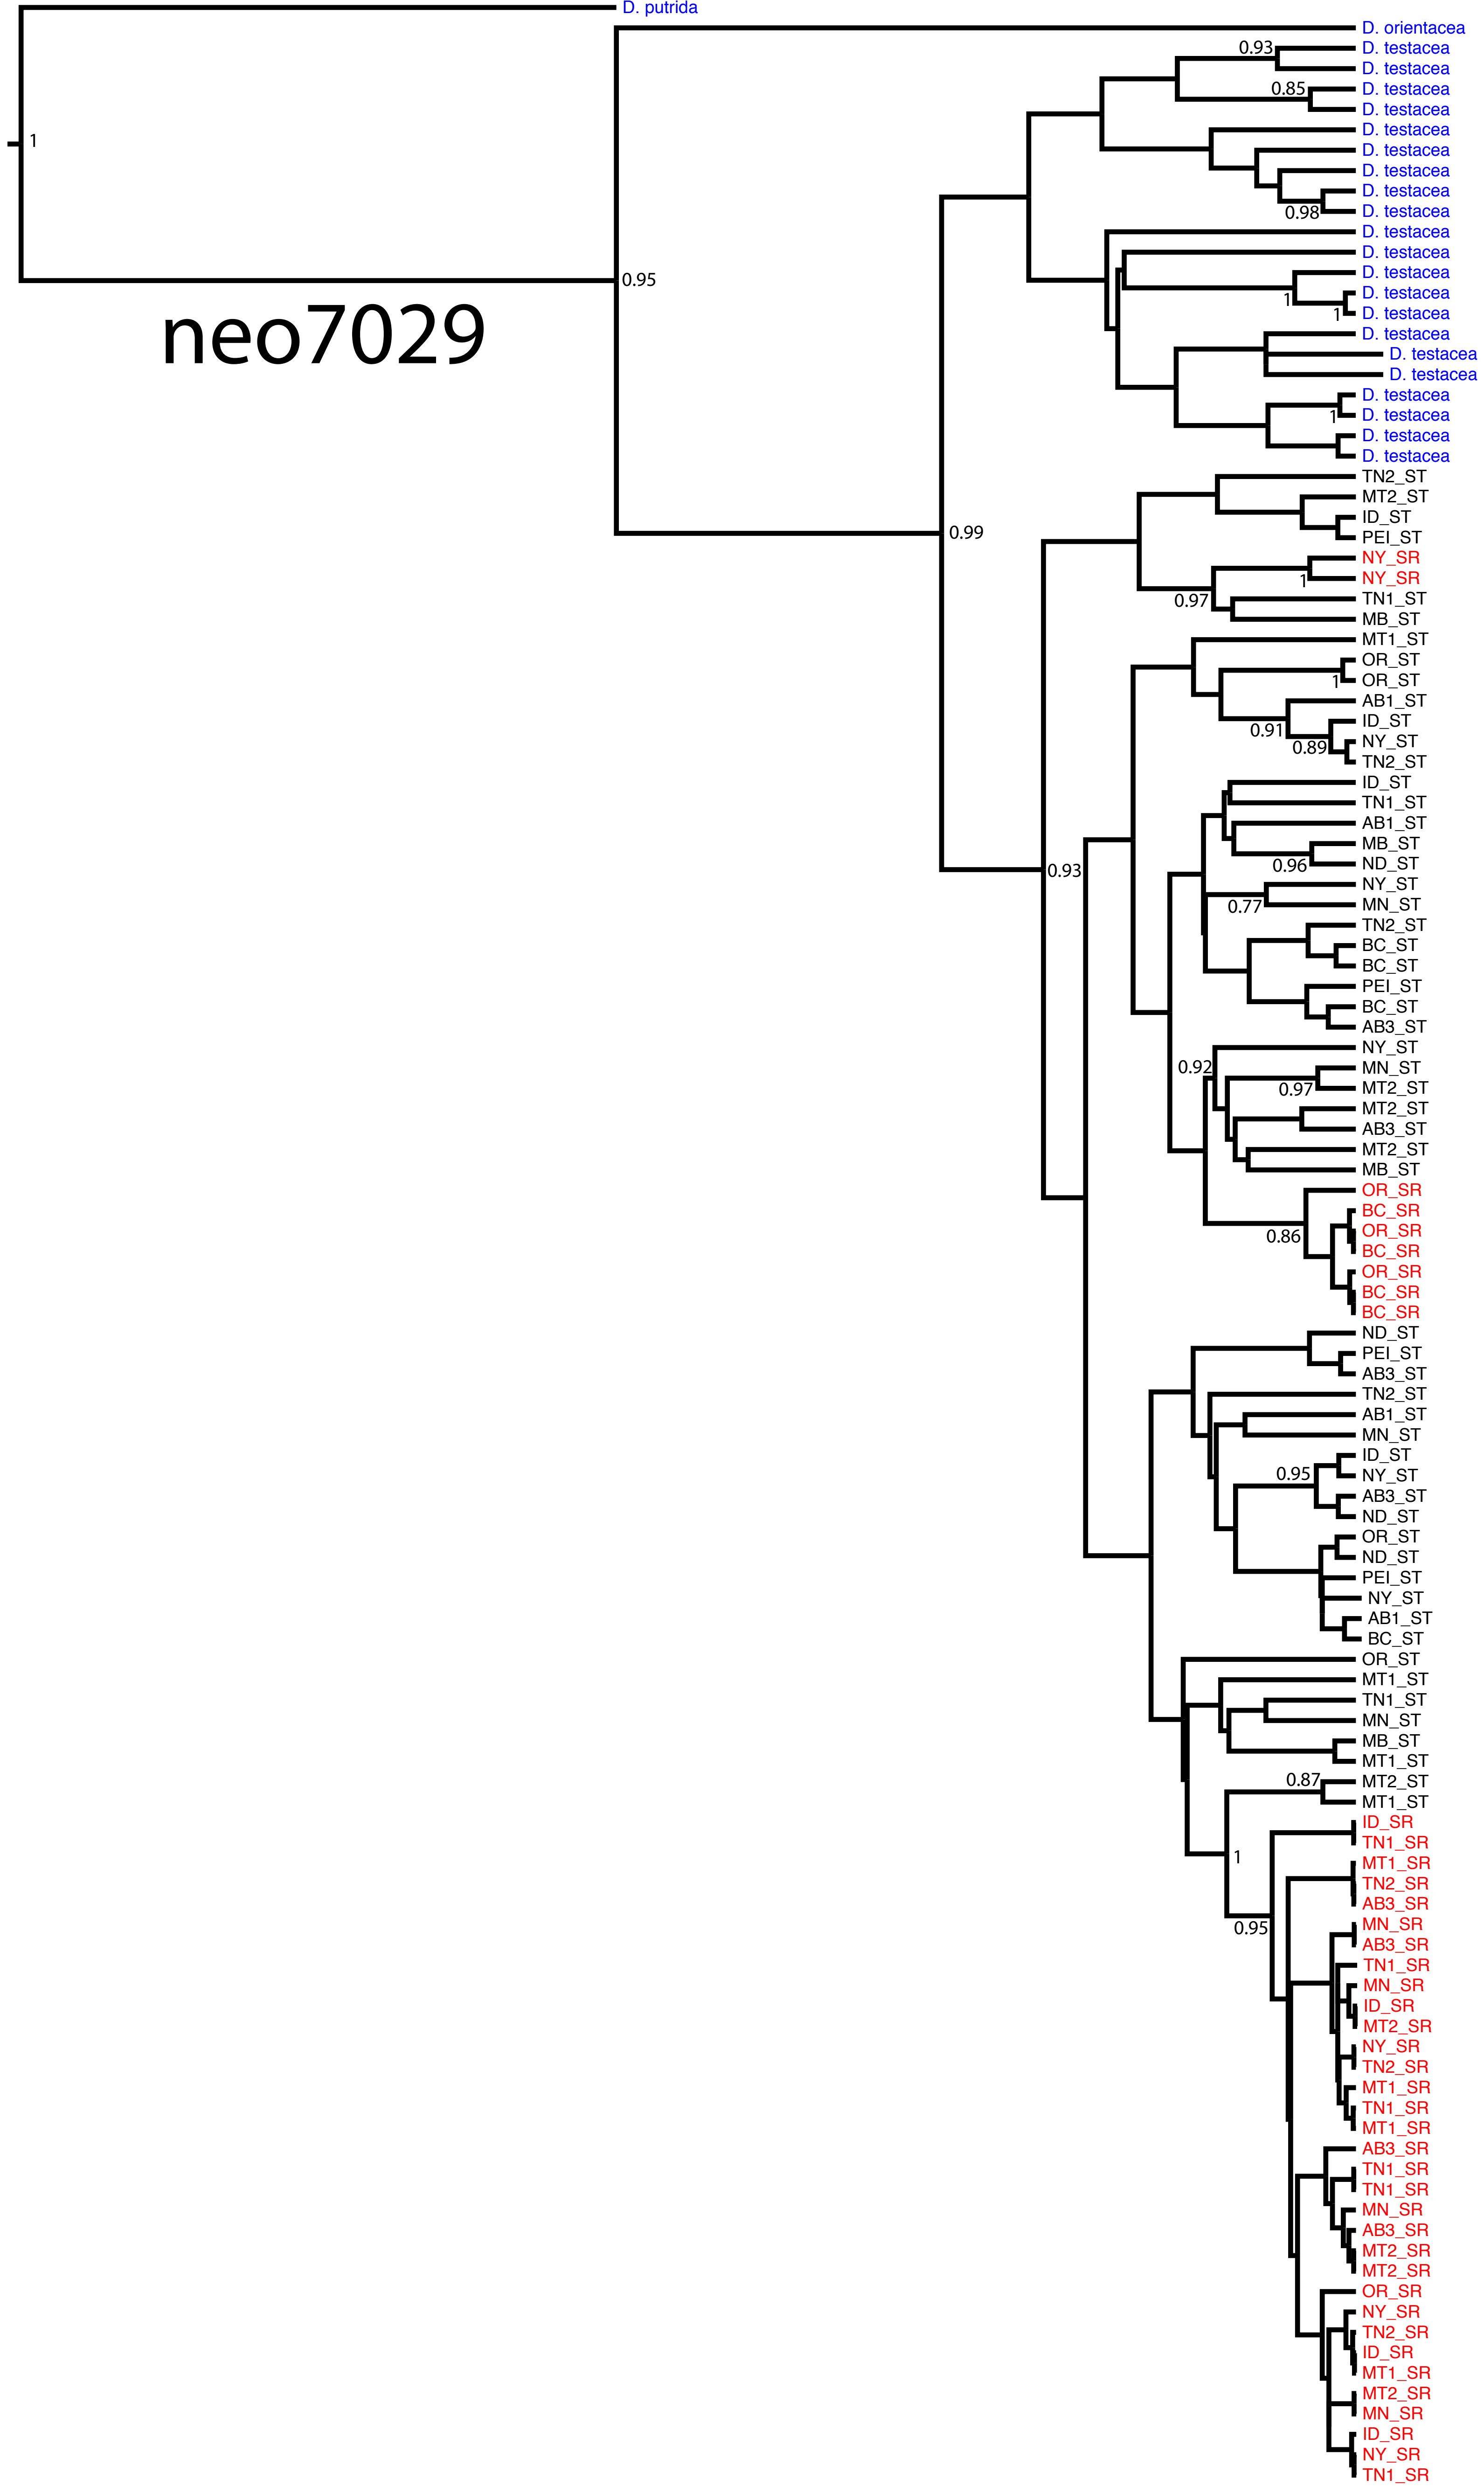

D. putrida

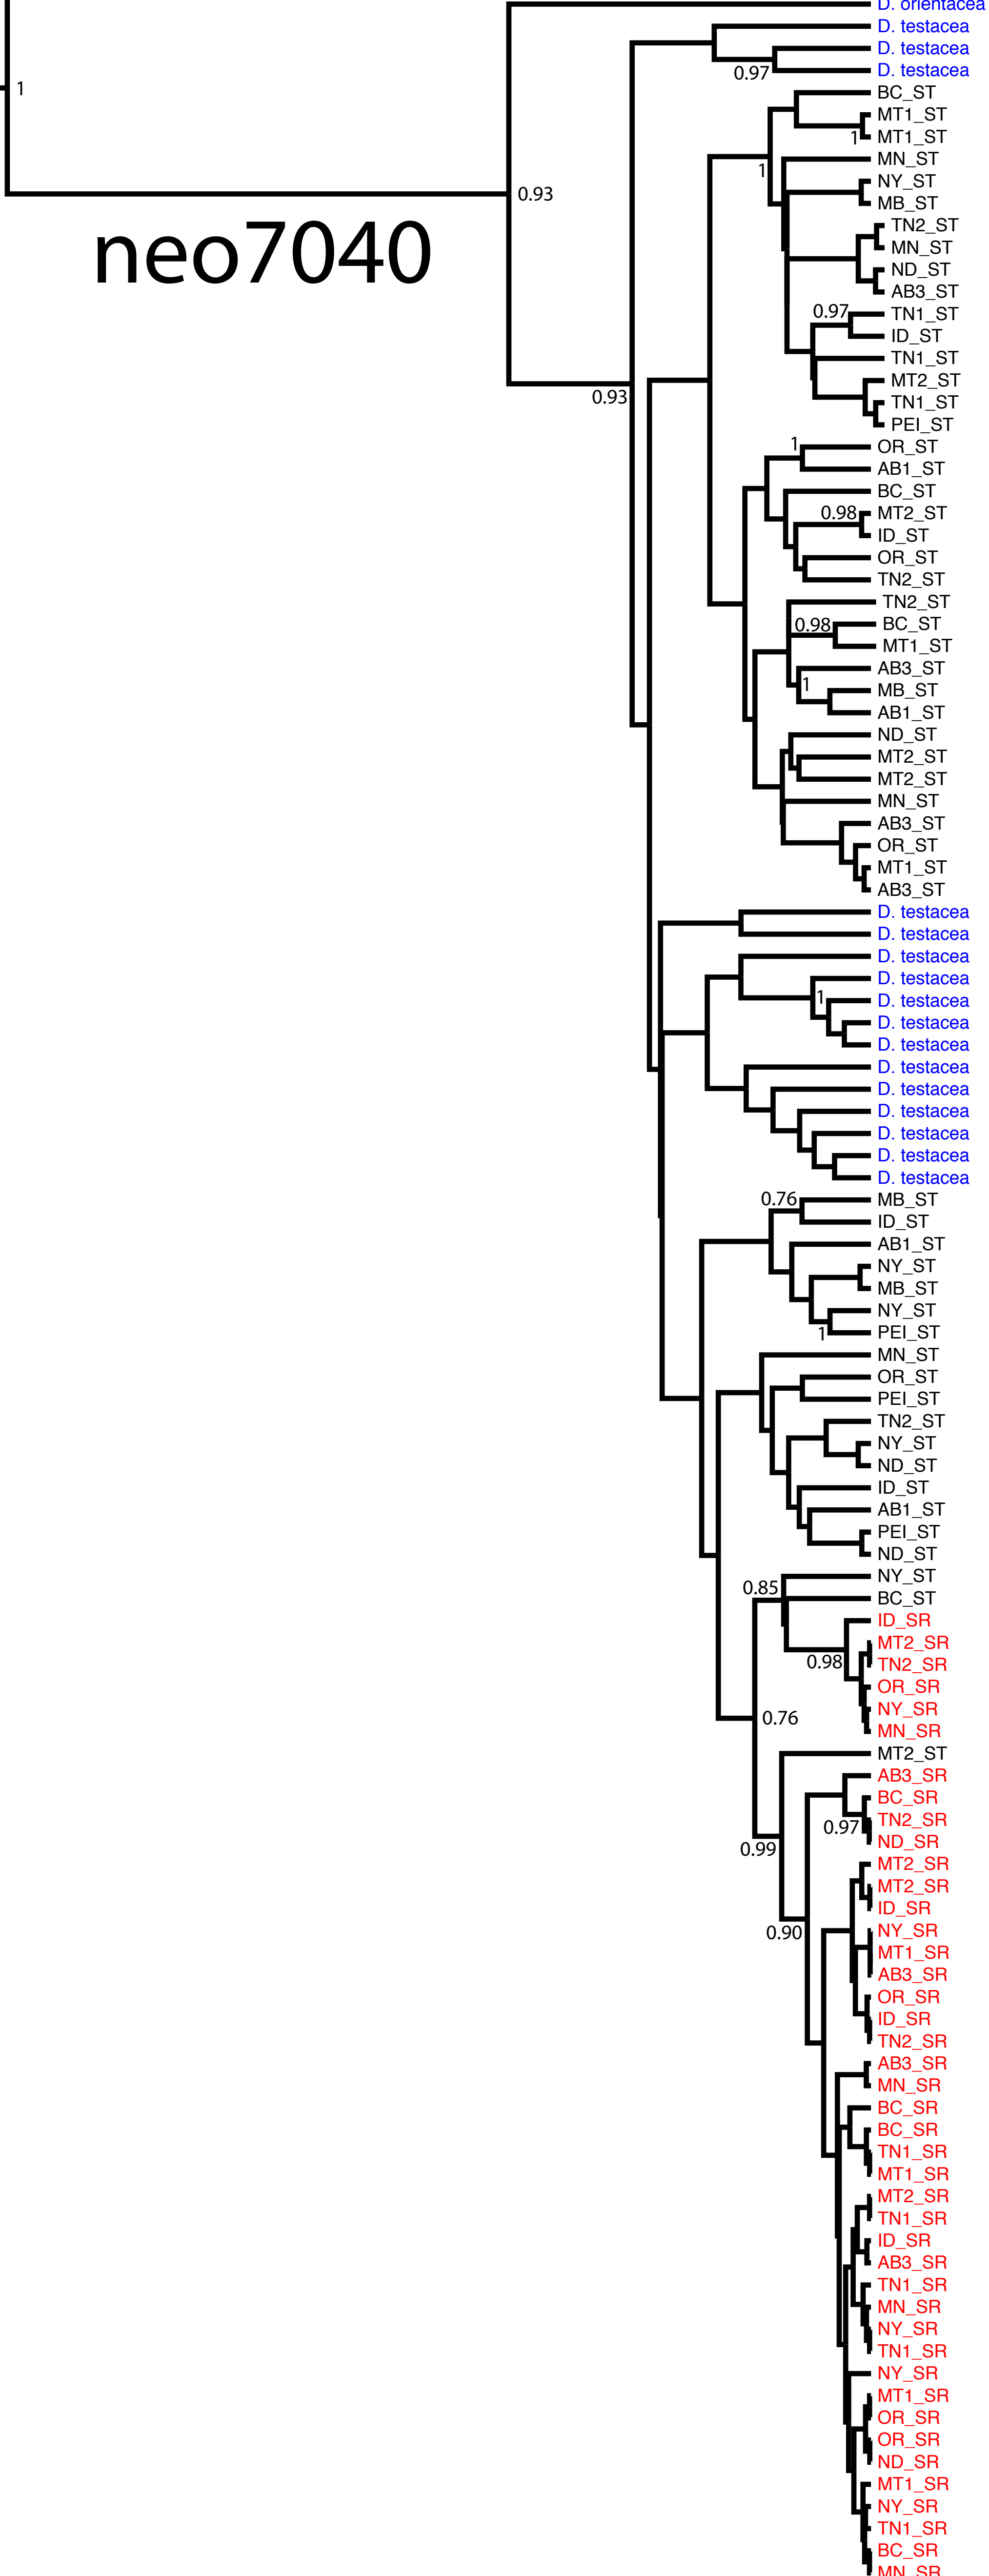

neo7040

1

0.93

0.93

0.97

1

0.97

1

0.98

0.98

1

1

0.76

1

0.85

0.98

0.76

0.99

0.97

0.90

D. putrida

neo8377

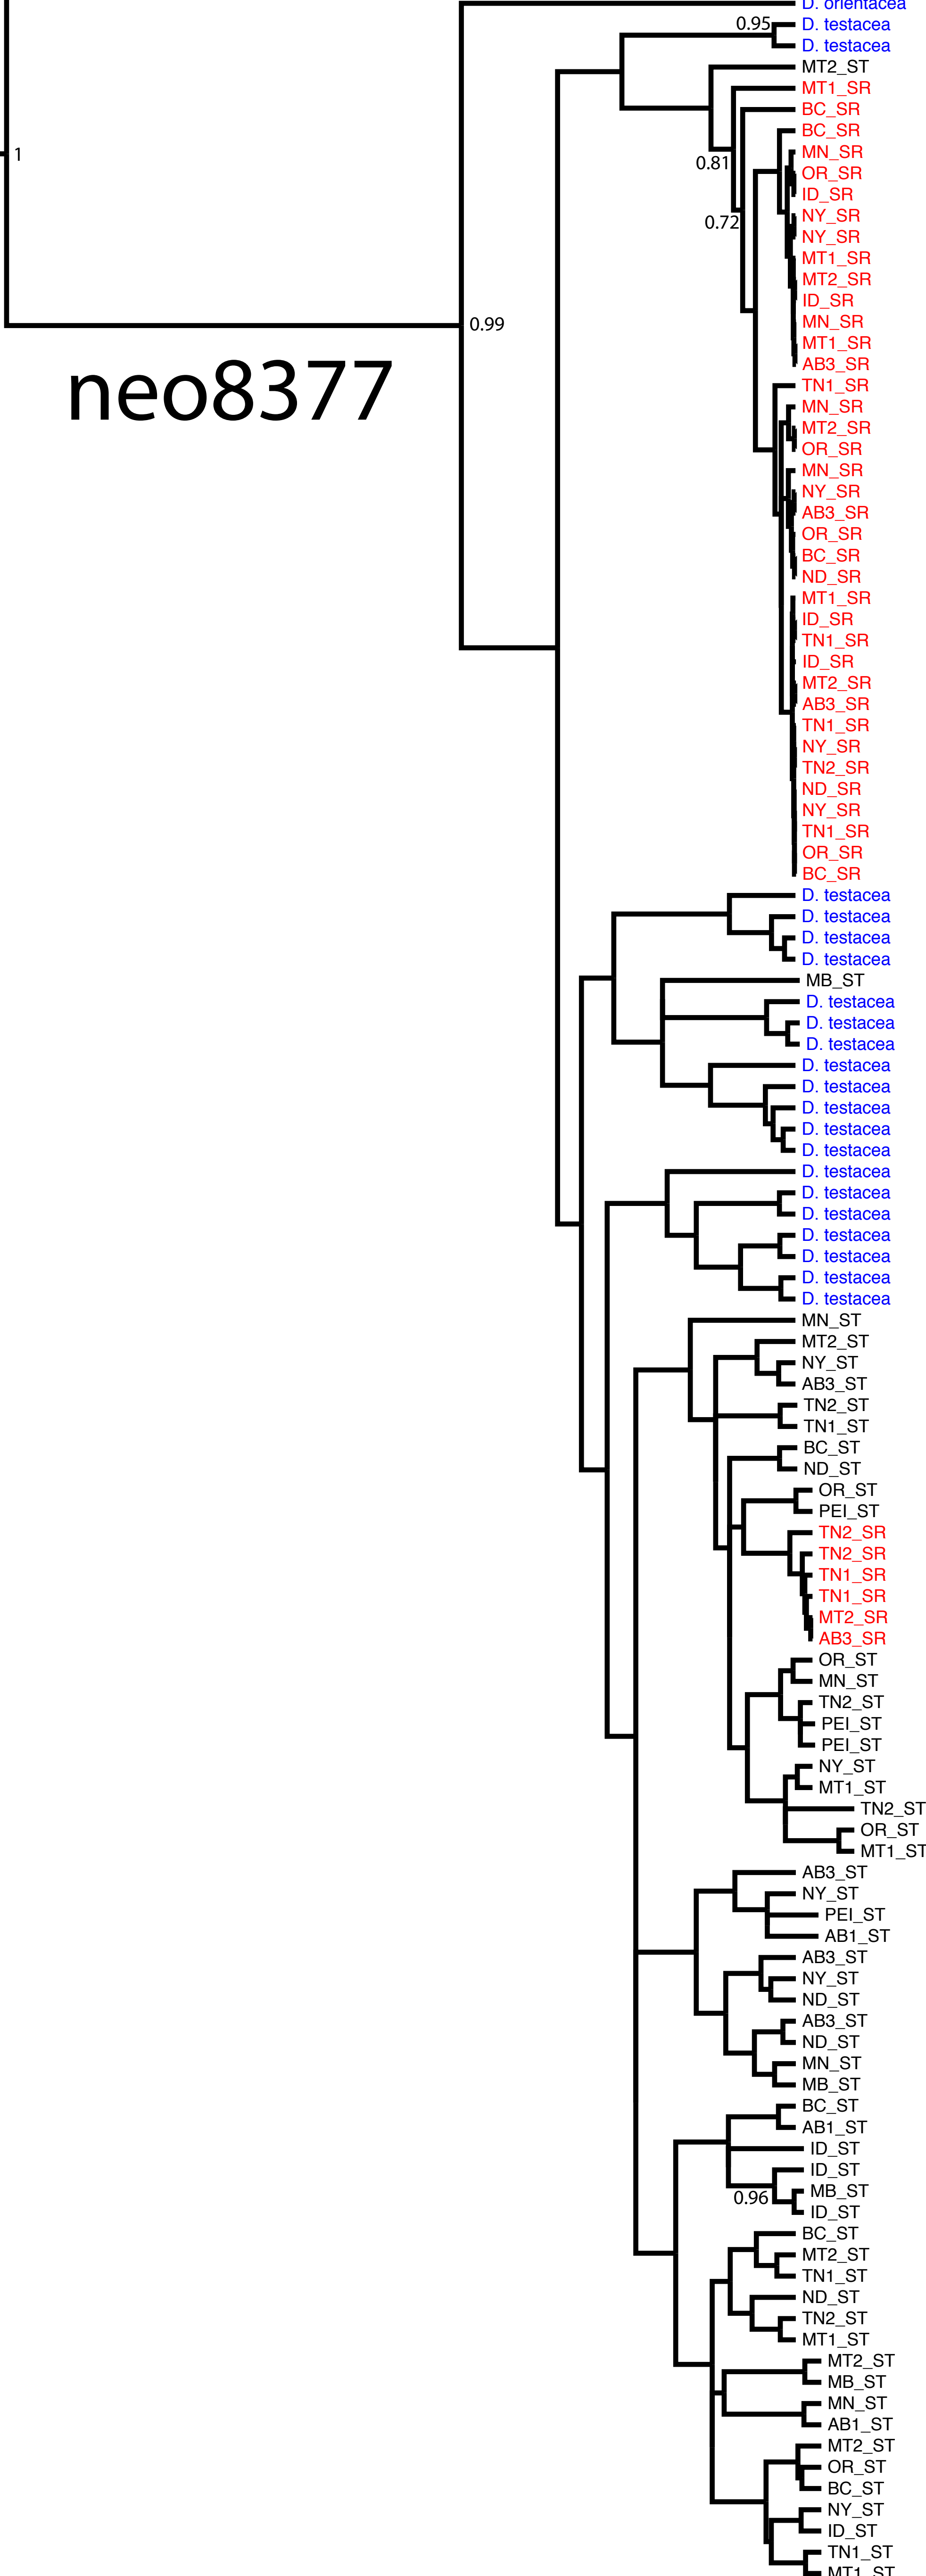

D. putrida

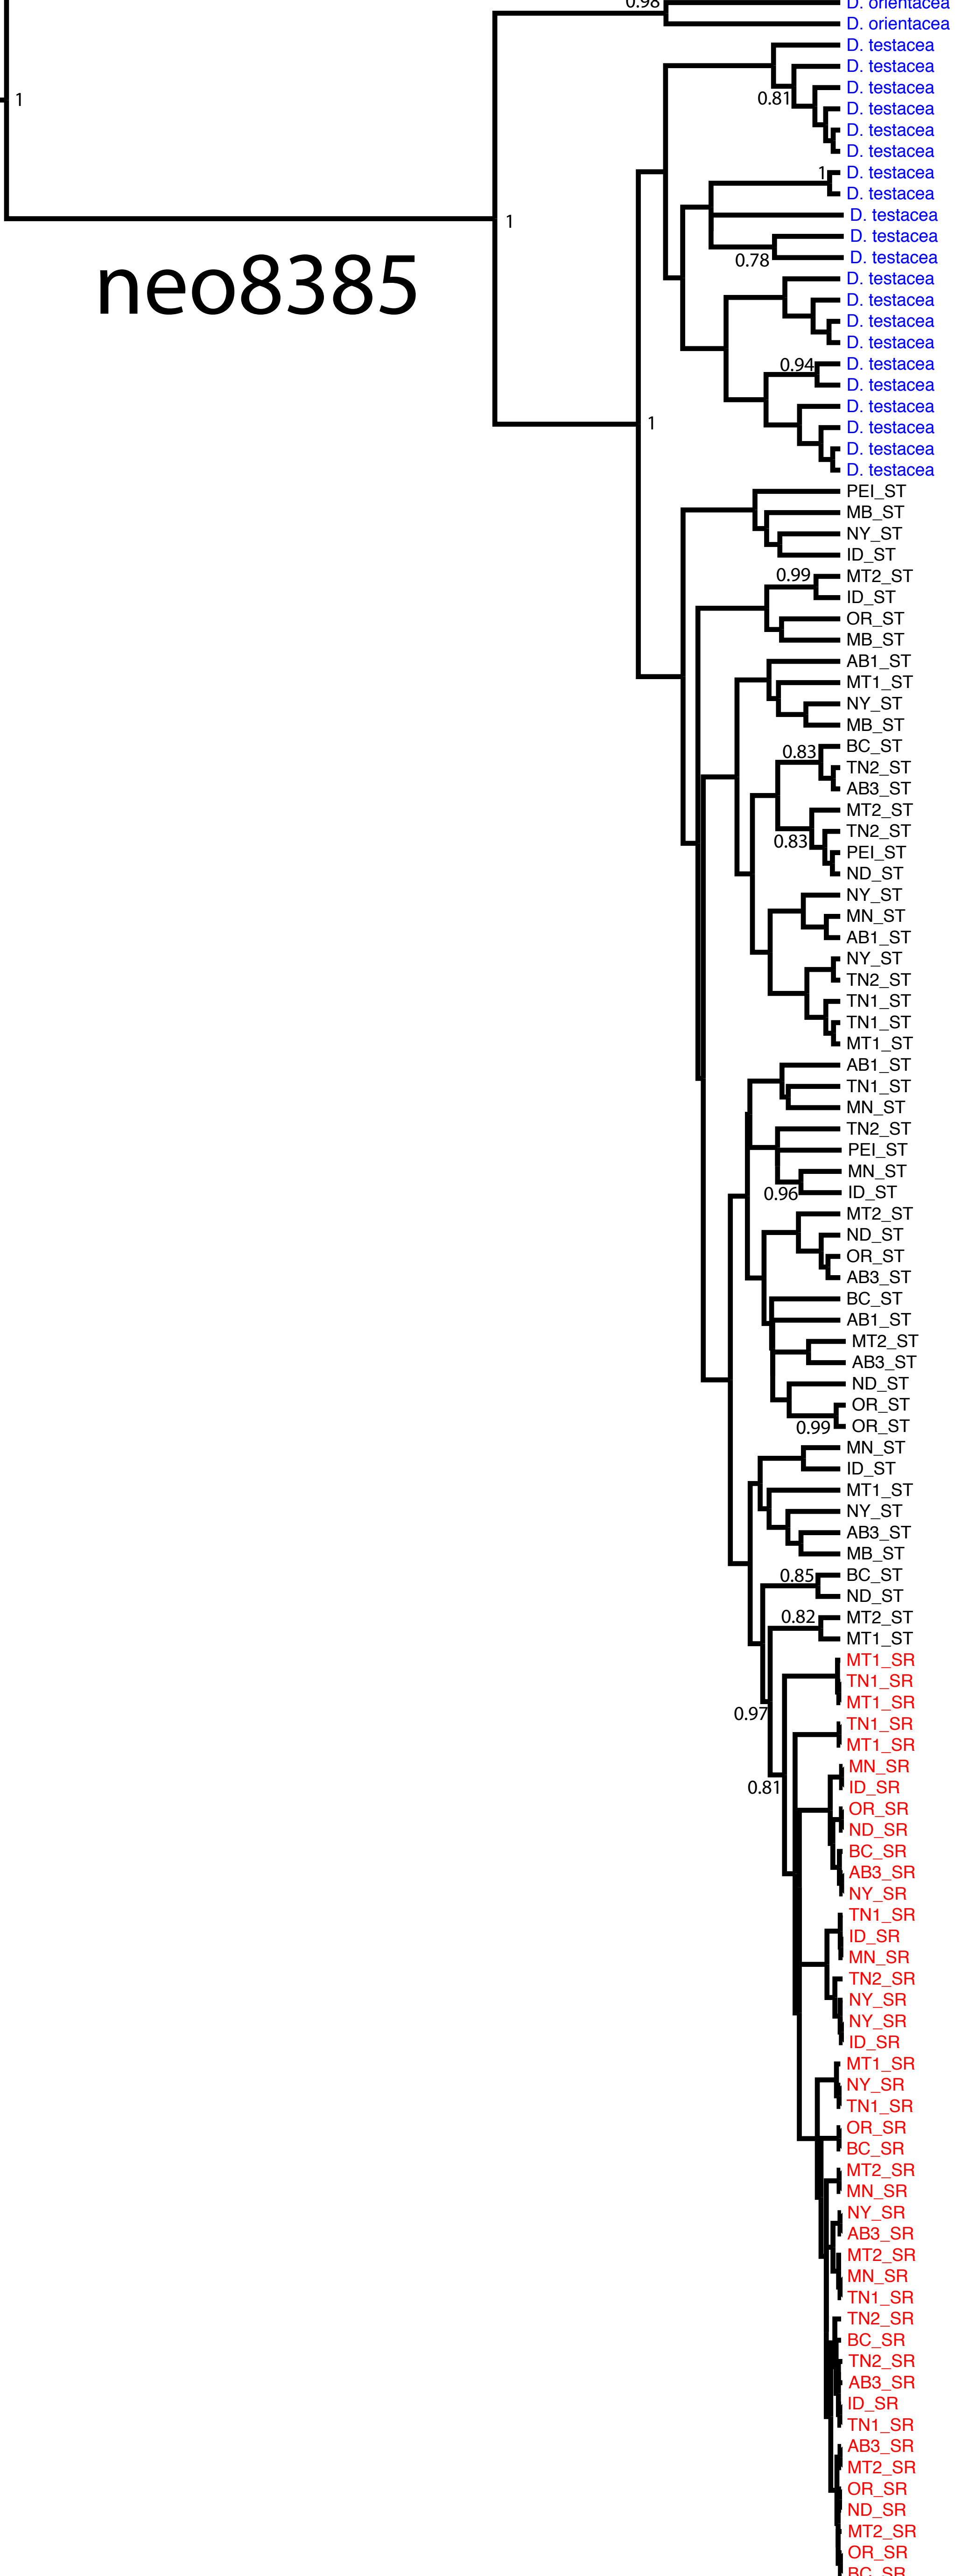

neo8385

0.98

0.81

1

0.78

0.94

1

0.99

0.83

0.83

0.96

0.99

0.85

0.82

0.97

0.81



D. putrida

marf

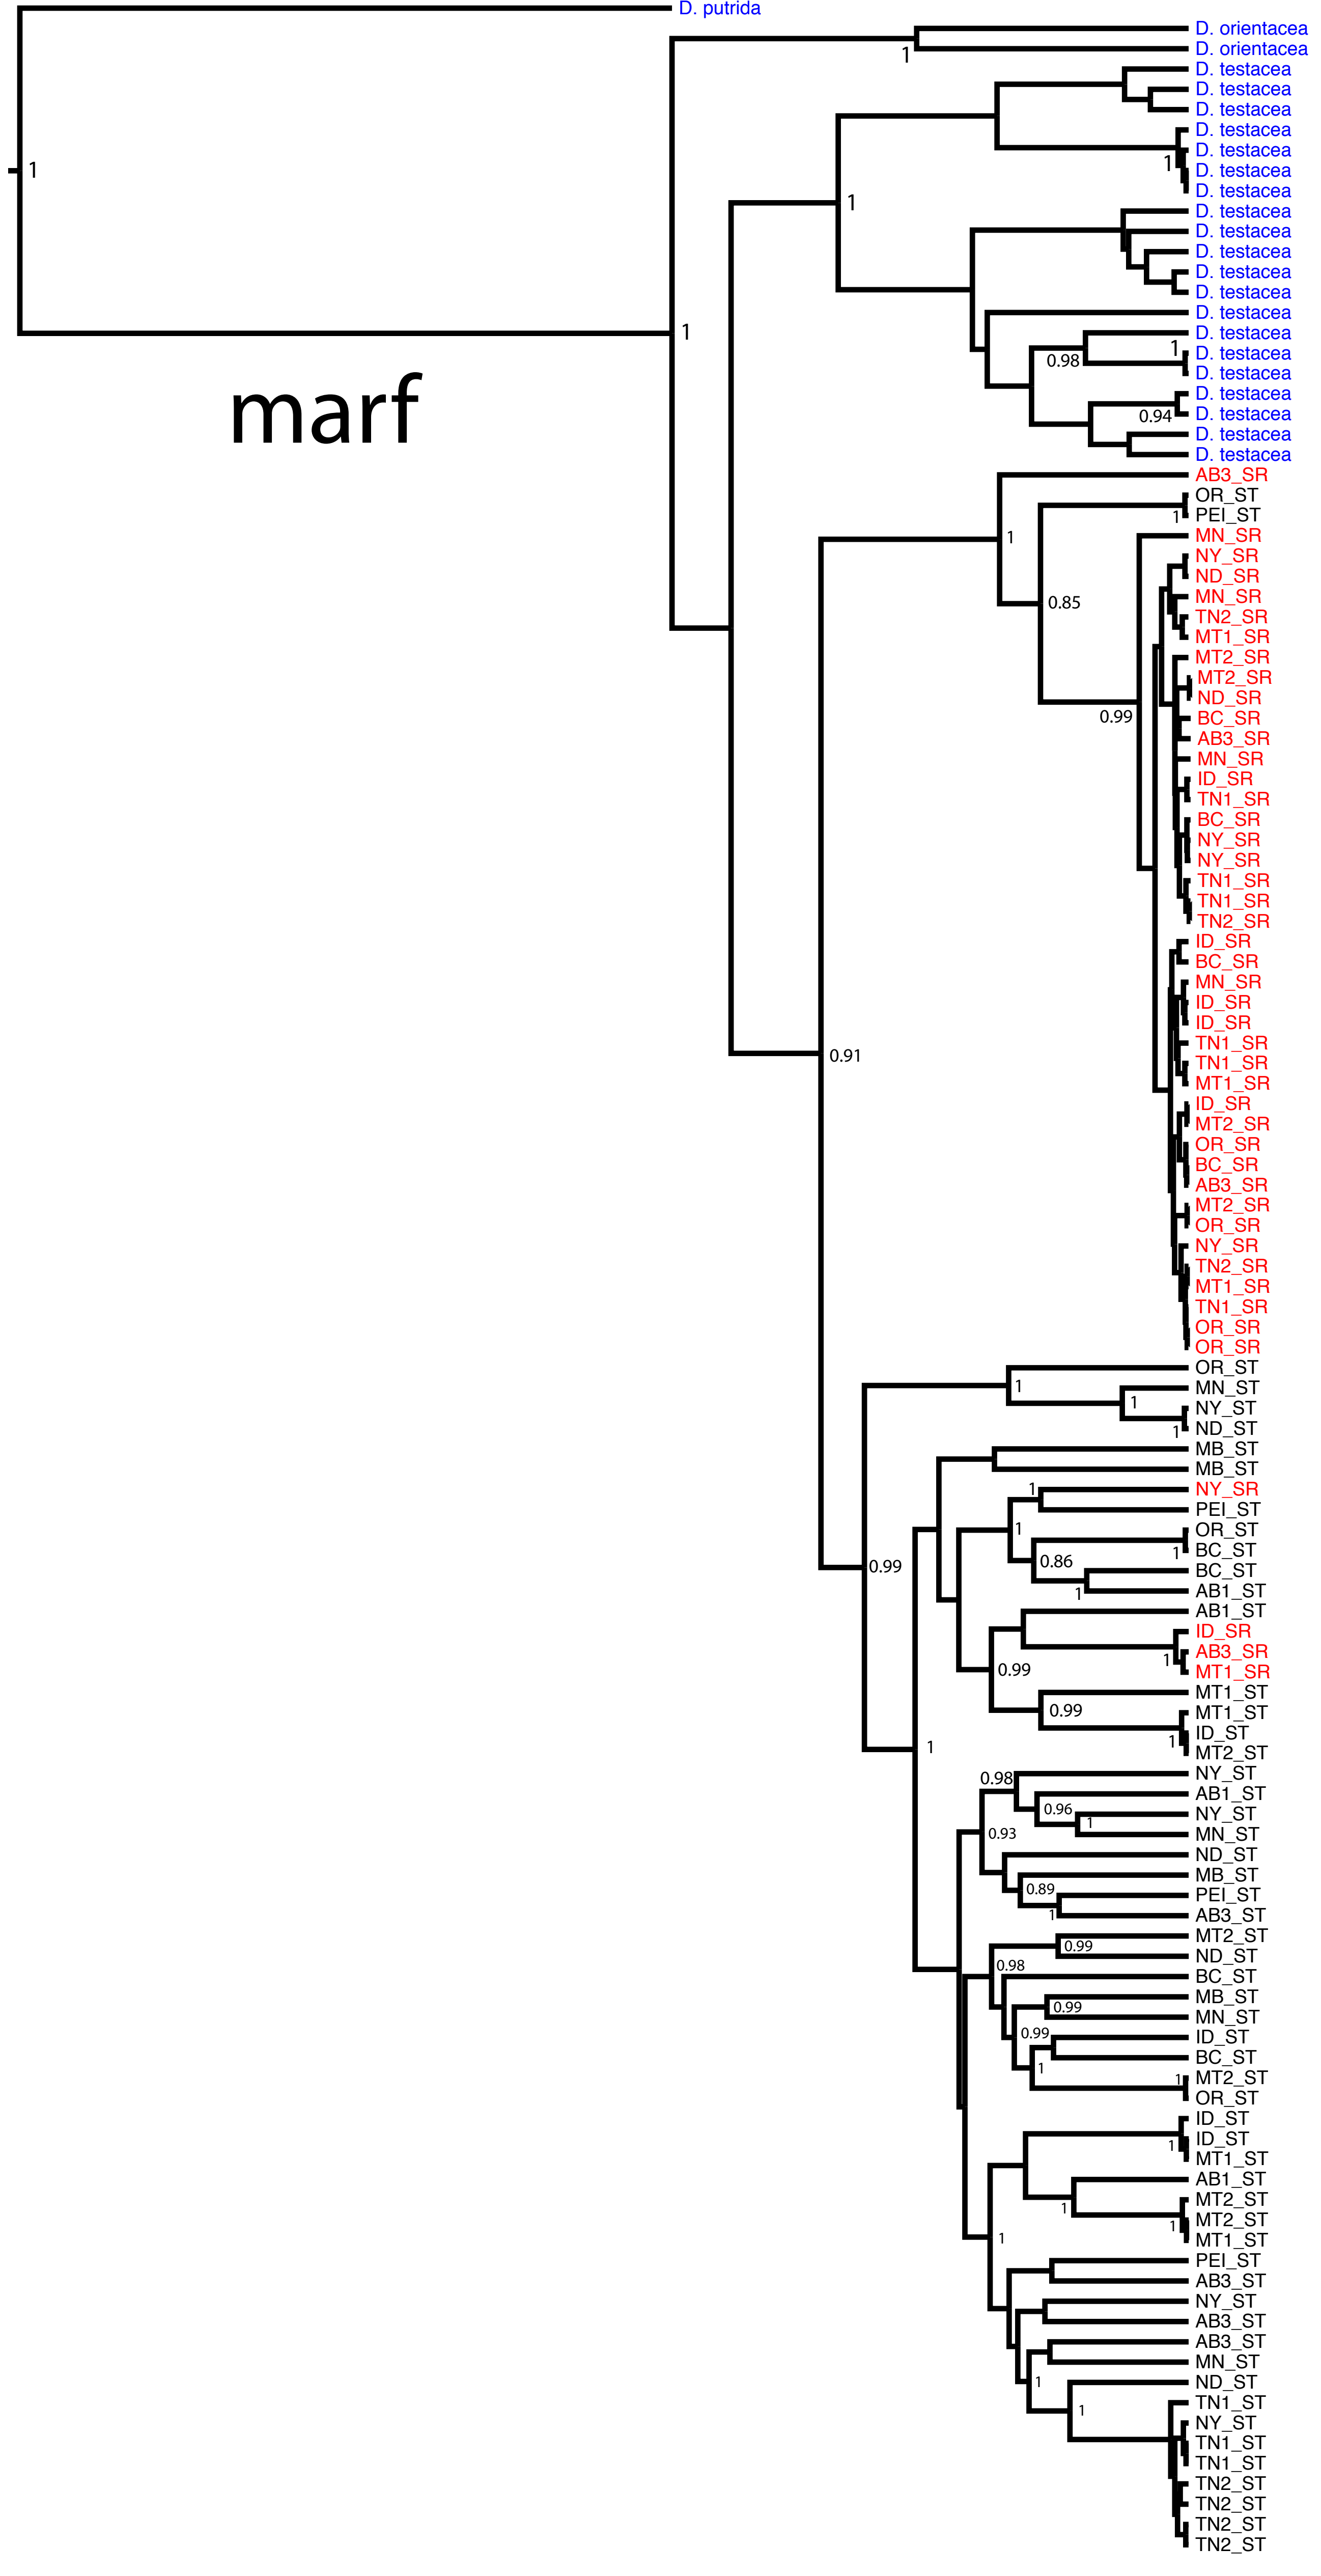



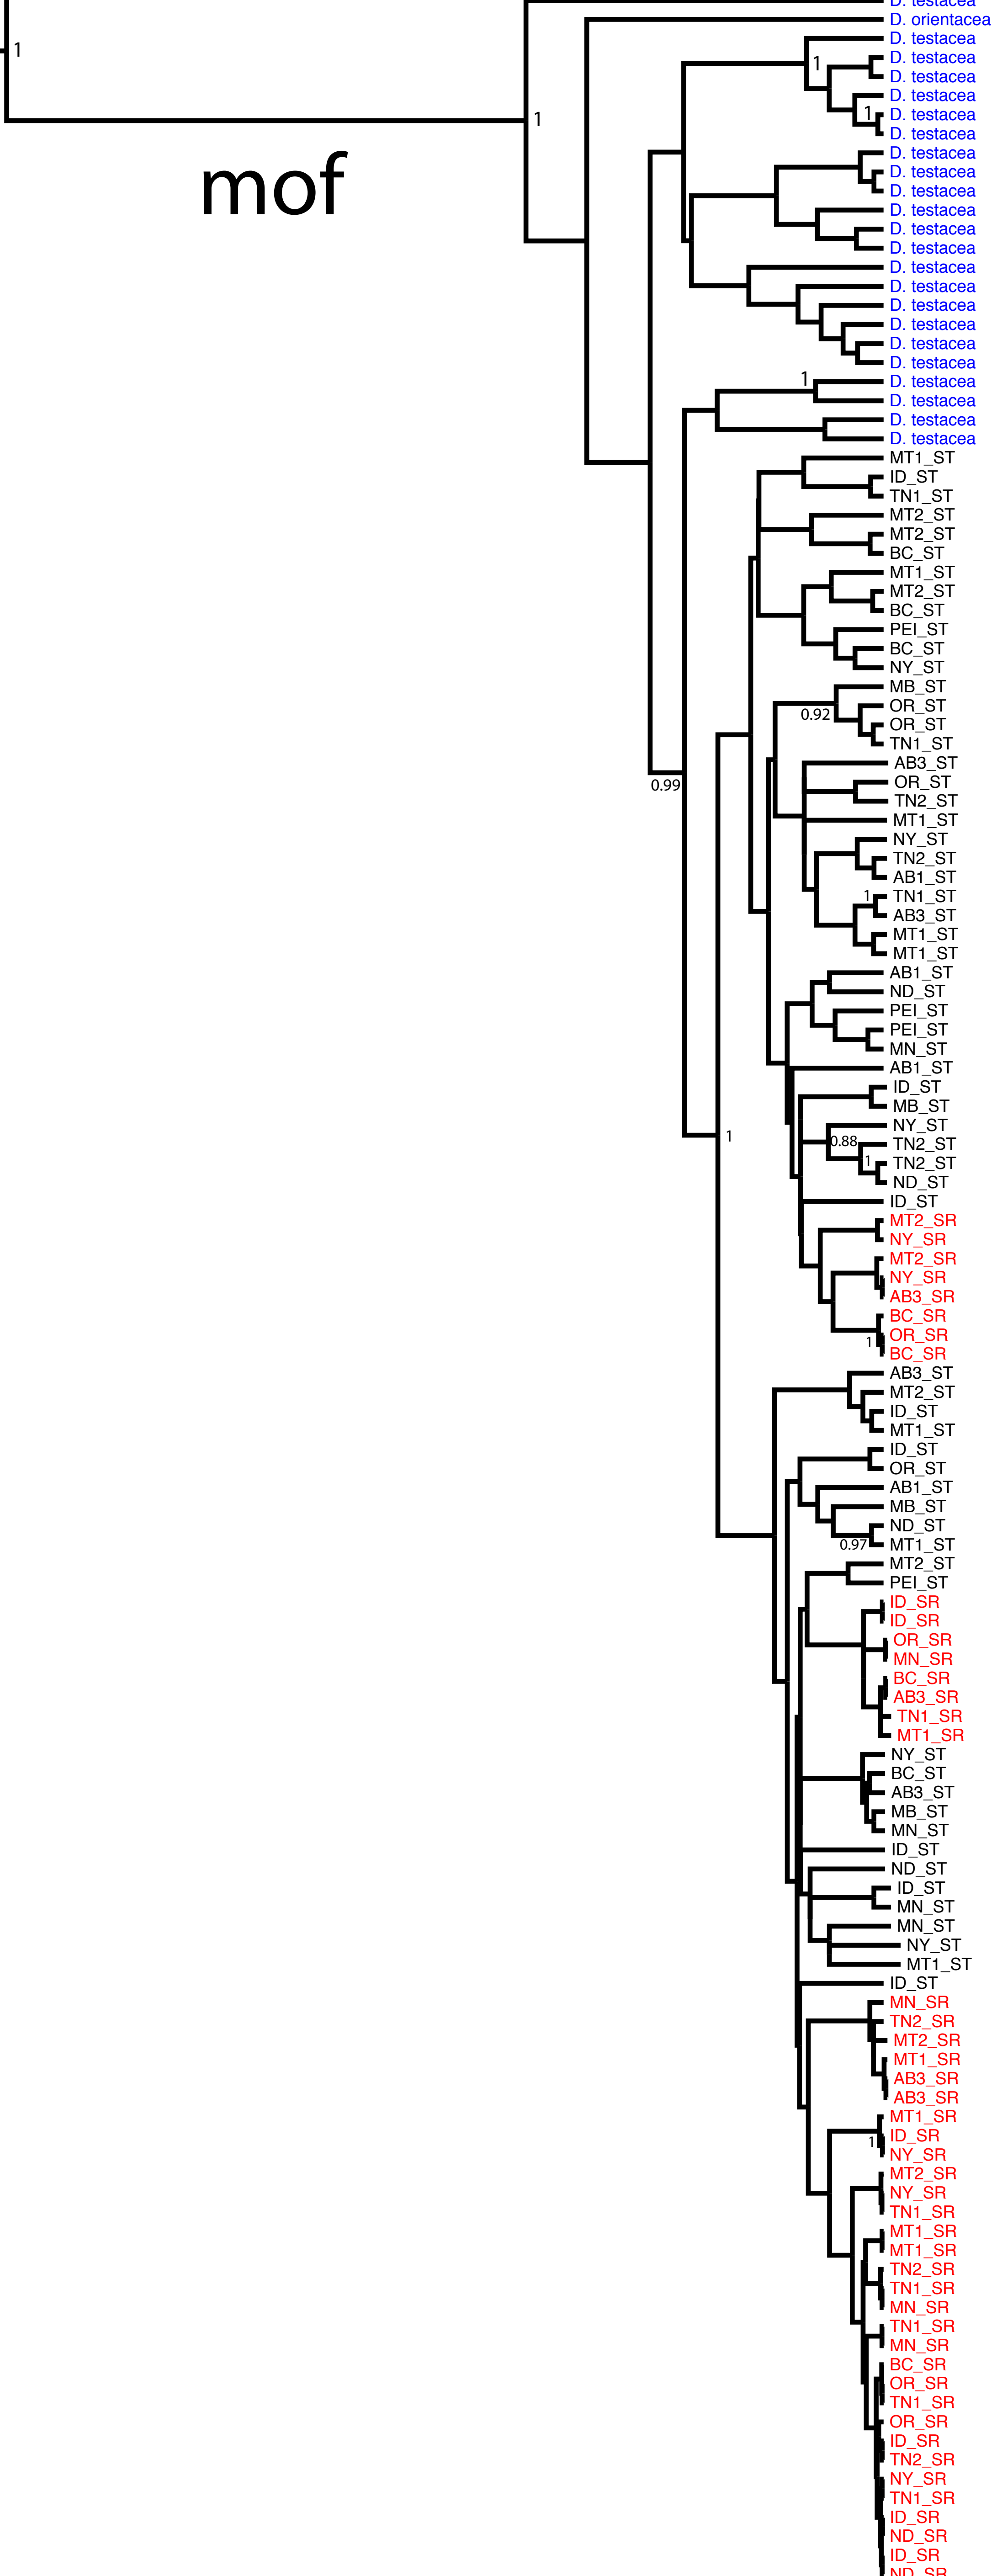

mof

- D. testacea
- D. orientacea
- D. testacea
- MT1\_ST
- ID\_ST
- TN1\_ST
- MT2\_ST
- MT2\_ST
- BC\_ST
- MT1\_ST
- MT2\_ST
- BC\_ST
- PEI\_ST
- BC\_ST
- NY\_ST
- MB\_ST
- OR\_ST
- OR\_ST
- TN1\_ST
- AB3\_ST
- OR\_ST
- TN2\_ST
- MT1\_ST
- NY\_ST
- TN2\_ST
- AB1\_ST
- TN1\_ST
- AB3\_ST
- MT1\_ST
- MT1\_ST
- AB1\_ST
- ND\_ST
- PEI\_ST
- PEI\_ST
- MN\_ST
- AB1\_ST
- ID\_ST
- MB\_ST
- NY\_ST
- TN2\_ST
- TN2\_ST
- ND\_ST
- ID\_ST
- MT2\_SR
- NY\_SR
- MT2\_SR
- NY\_SR
- AB3\_SR
- BC\_SR
- OR\_SR
- BC\_SR
- AB3\_ST
- MT2\_ST
- ID\_ST
- MT1\_ST
- ID\_ST
- OR\_ST
- AB1\_ST
- MB\_ST
- ND\_ST
- MT1\_ST
- MT2\_ST
- PEI\_ST
- ID\_SR
- ID\_SR
- OR\_SR
- MN\_SR
- BC\_SR
- BC\_SR
- AB3\_SR
- TN1\_SR
- MT1\_SR
- NY\_ST
- BC\_ST
- AB3\_ST
- MB\_ST
- MN\_ST
- ID\_ST
- ND\_ST
- ID\_ST
- MN\_ST
- MN\_ST
- NY\_ST
- MT1\_ST
- ID\_ST
- MN\_SR
- TN2\_SR
- MT2\_SR
- MT1\_SR
- AB3\_SR
- AB3\_SR
- MT1\_SR
- ID\_SR
- NY\_SR
- MT2\_SR
- NY\_SR
- TN1\_SR
- MT1\_SR
- MT1\_SR
- TN2\_SR
- TN1\_SR
- MN\_SR
- MN\_SR
- TN1\_SR
- MN\_SR
- BC\_SR
- OR\_SR
- TN1\_SR
- OR\_SR
- ID\_SR
- TN2\_SR
- NY\_SR
- TN1\_SR
- ID\_SR
- ND\_SR
- ID\_SR
- ND\_SR

pgd

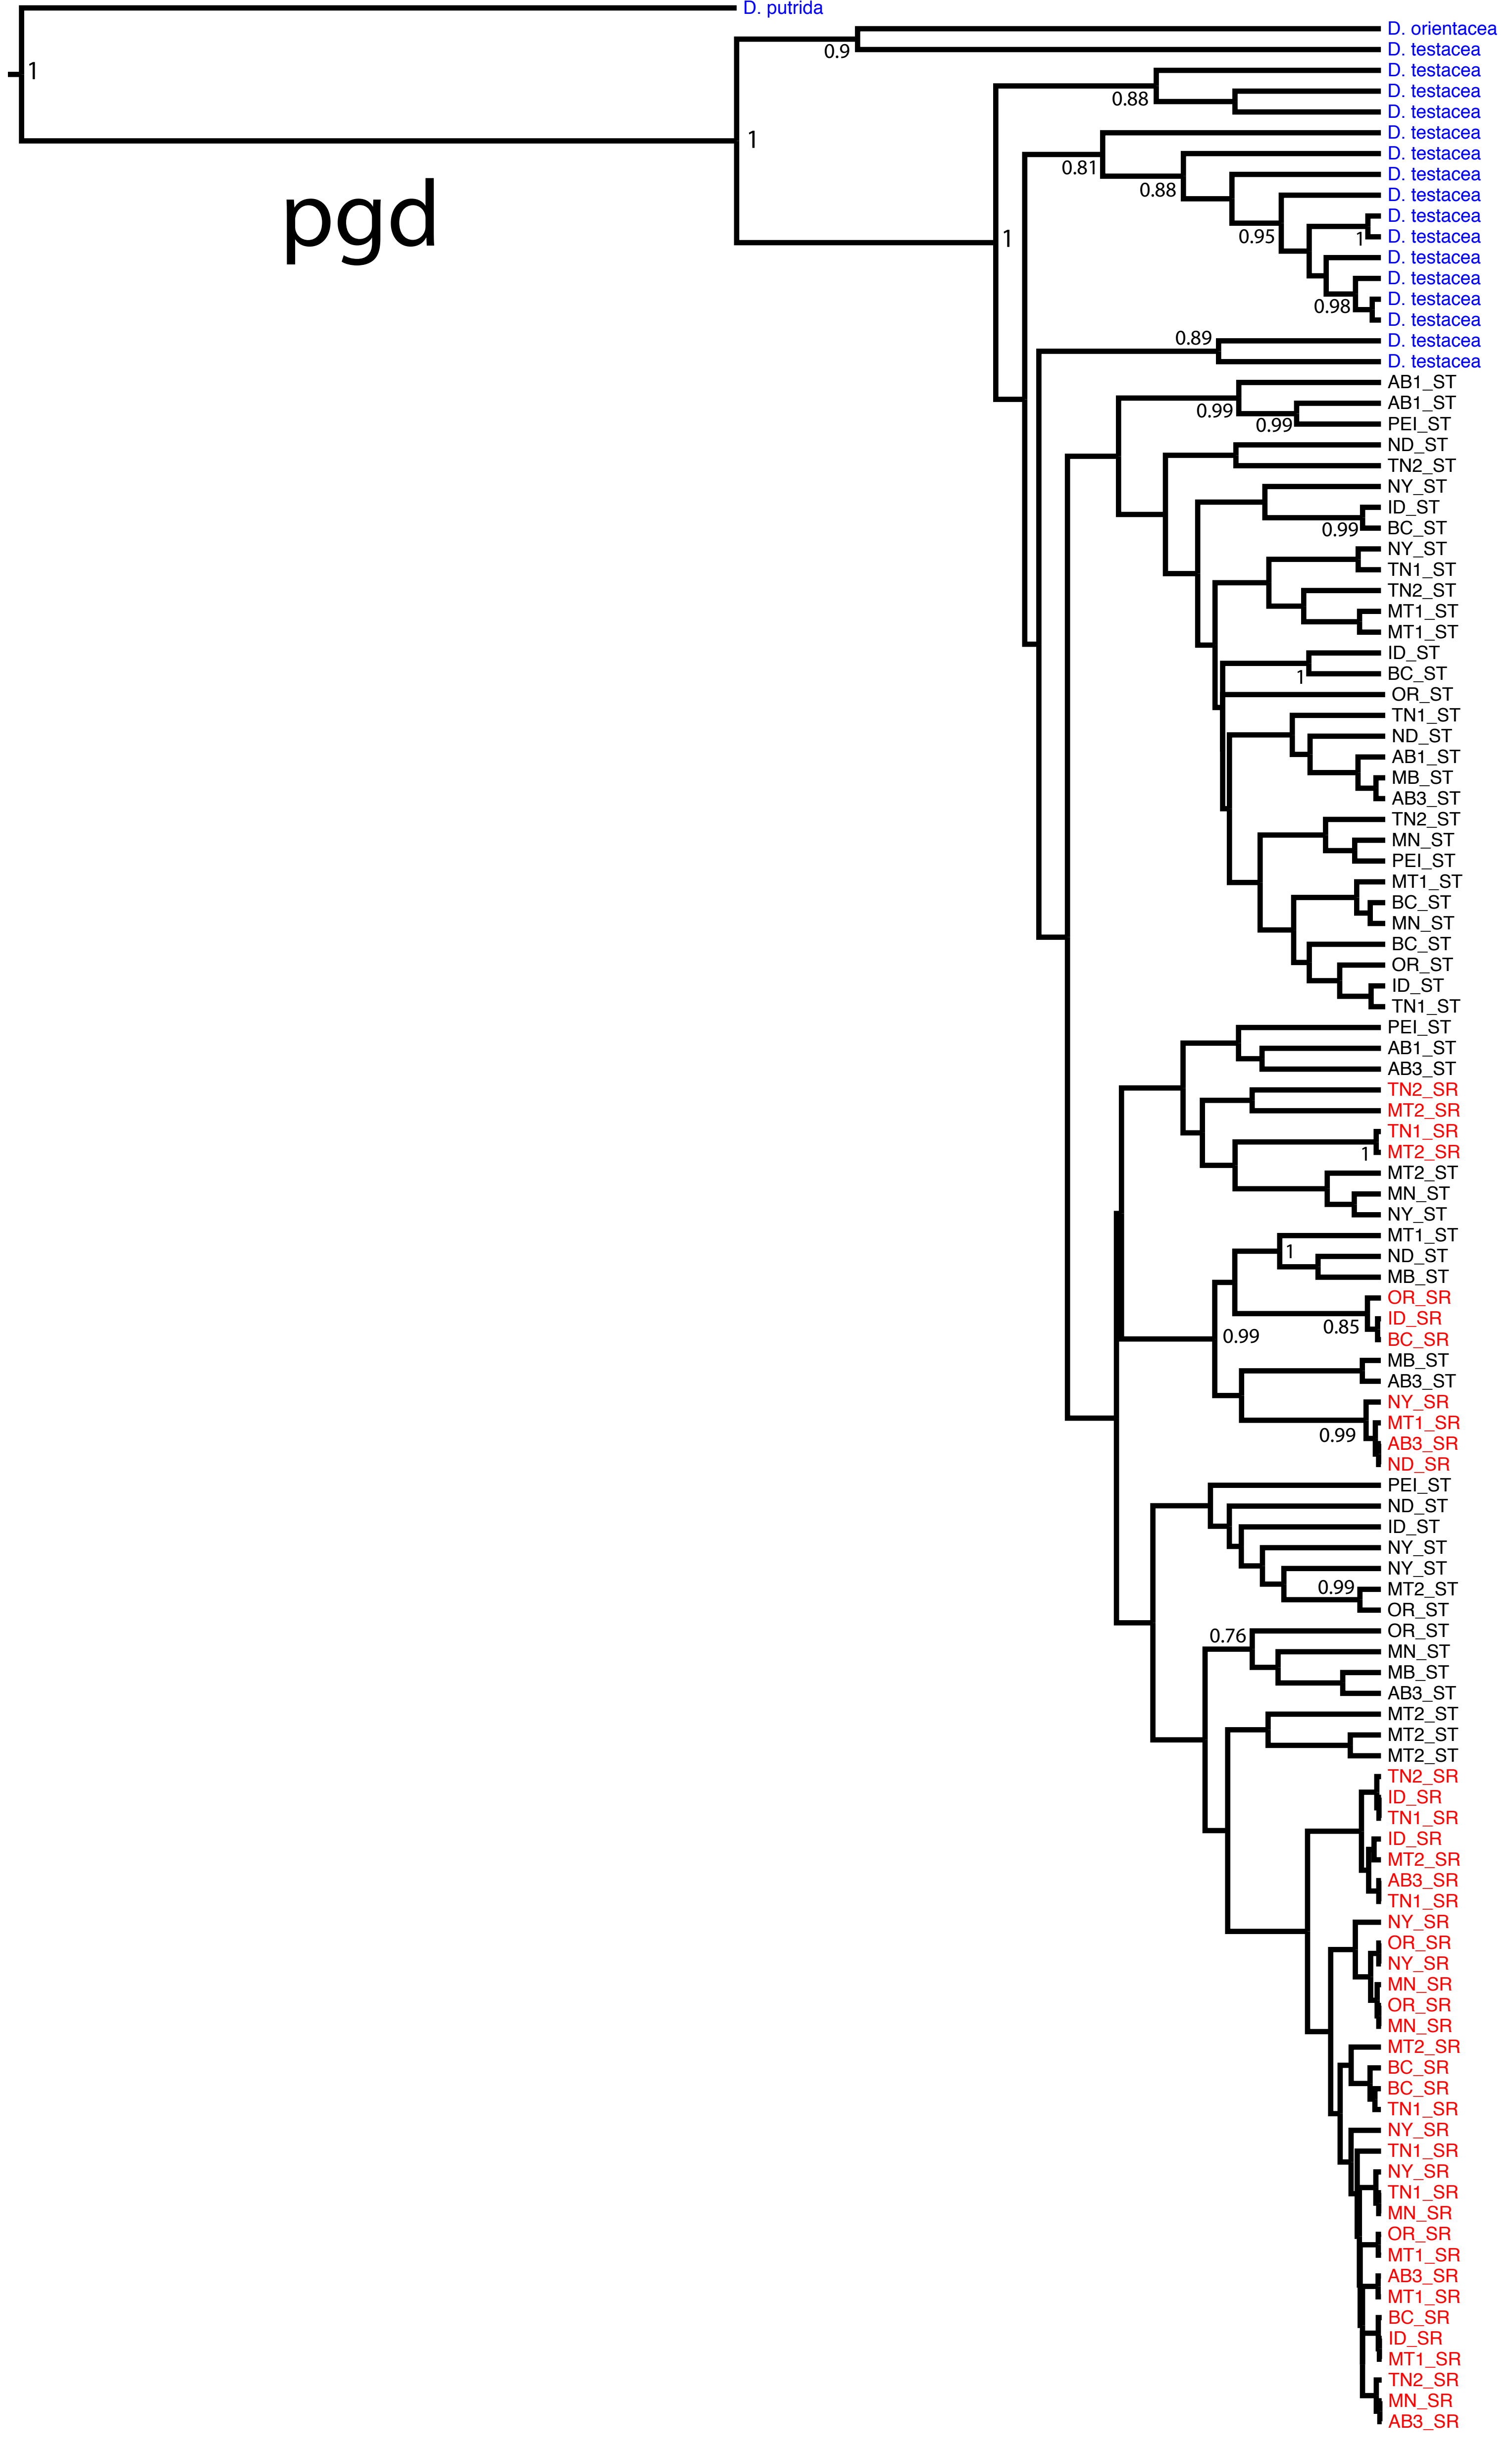

rpl

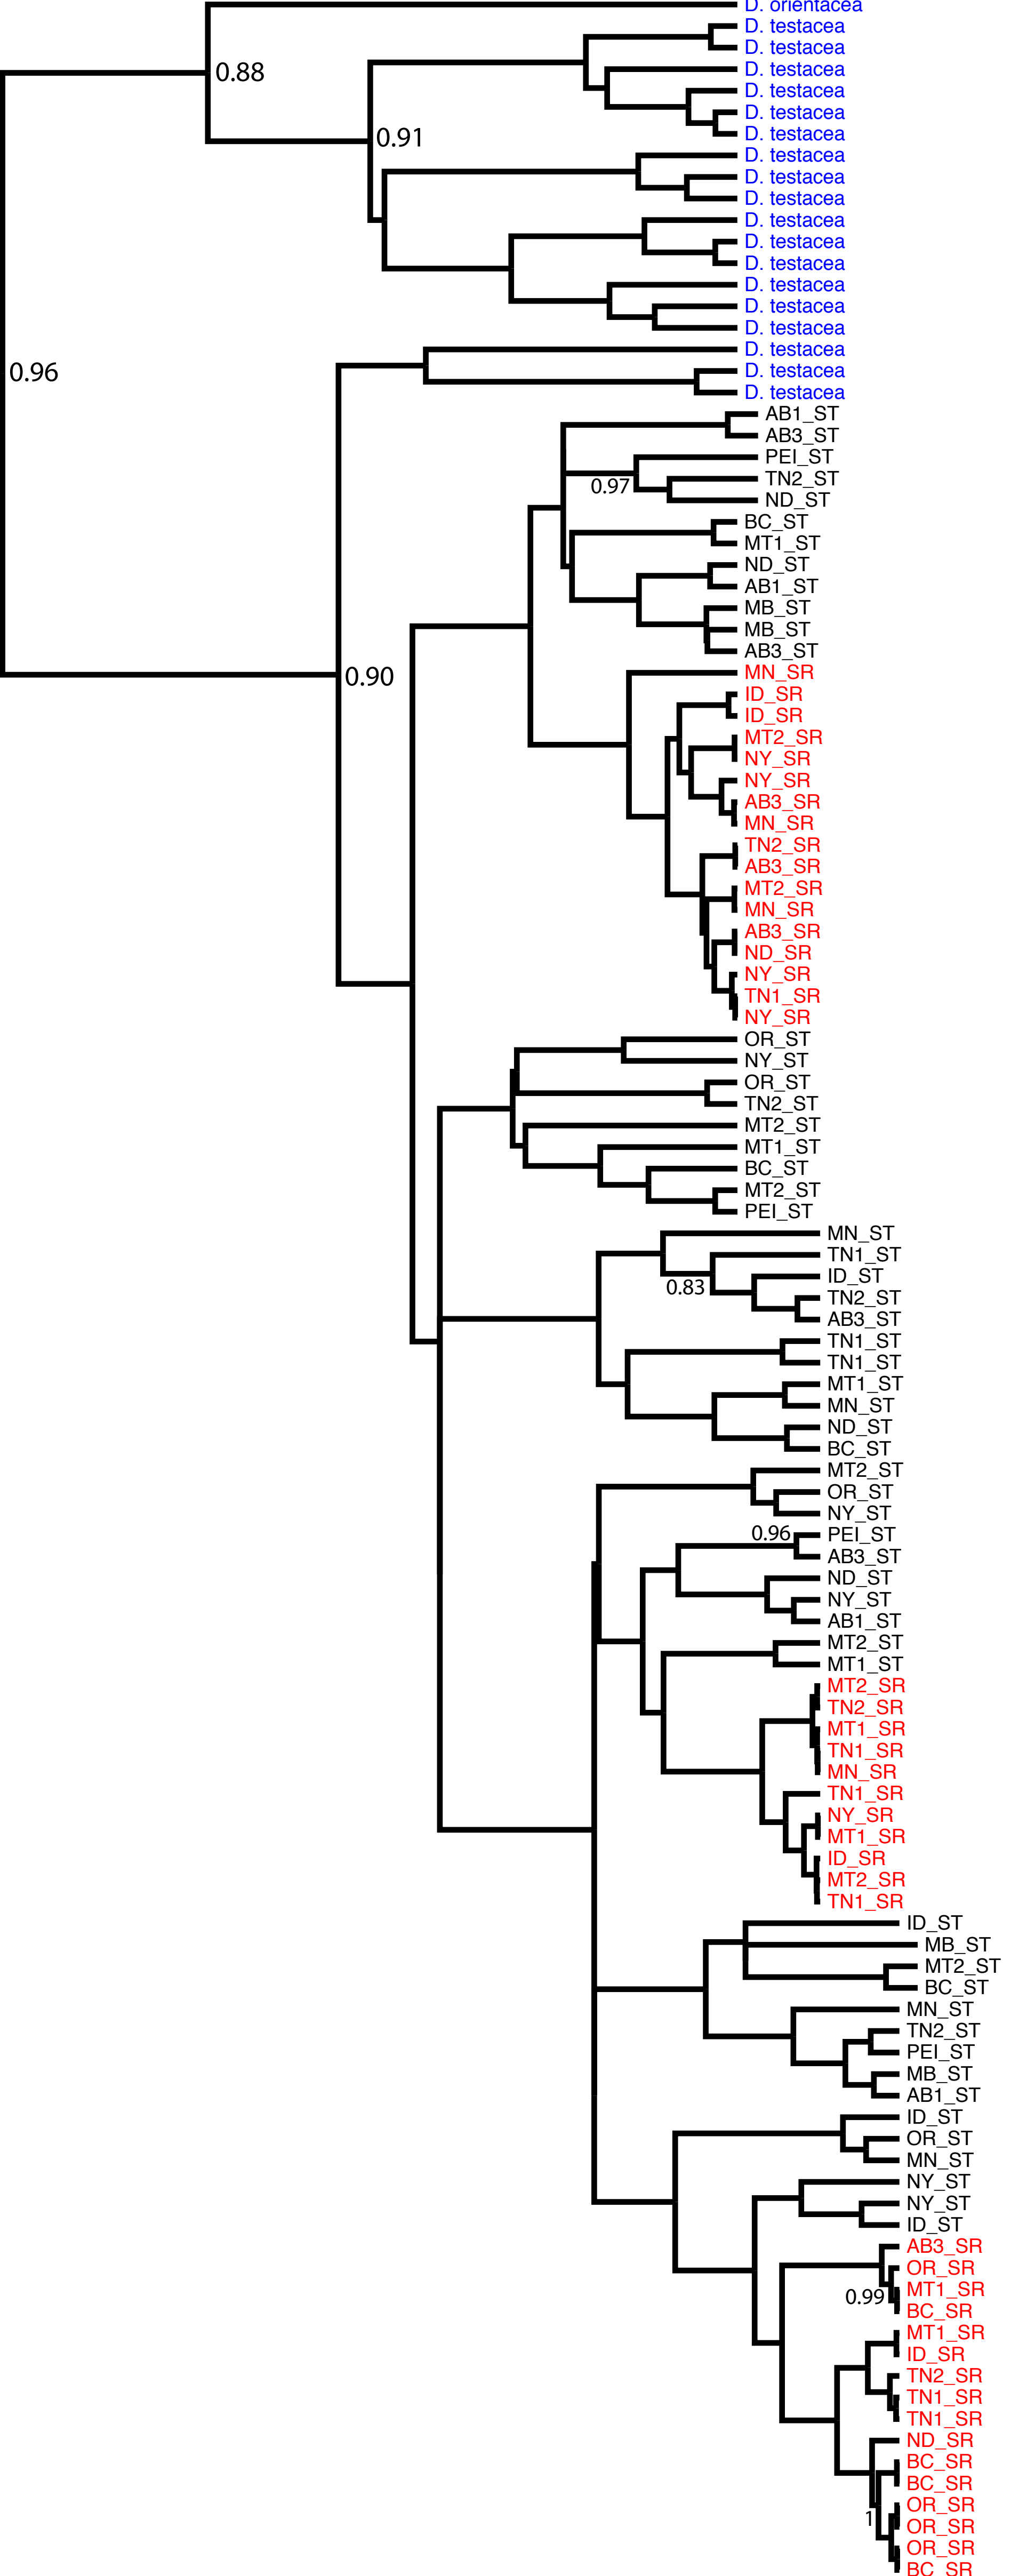



D. putrida

sxl

0.97

0.90

- D. orientacea
- D. testacea
- MT2\_ST
- AB1\_ST
- MT2\_ST
- MN\_ST
- OR\_ST
- BC\_ST
- D. testacea
- ID\_ST
- ND\_ST
- MT1\_SR
- MT1\_ST
- MT1\_ST
- MT1\_ST
- MT1\_ST
- MB\_ST
- NY\_ST
- TN2\_ST
- OR\_ST
- NY\_ST
- ID\_ST
- ID\_ST
- AB1\_ST
- ND\_ST
- NY\_ST
- NY\_ST
- TN1\_ST
- MT2\_SR
- ND\_SR
- TN1\_SR
- AB3\_SR
- AB3\_SR
- ID\_SR
- AB3\_SR
- OR\_SR
- MN\_SR
- OR\_SR
- OR\_SR
- TN1\_SR
- MT2\_SR
- TN1\_SR
- NY\_SR
- TN1\_SR
- ID\_SR
- TN2\_SR
- NY\_SR
- MT2\_SR
- MN\_SR
- OR\_SR
- BC\_SR
- NY\_SR
- MB\_ST
- TN2\_ST
- MT2\_ST
- MB\_ST
- TN2\_SR
- MT2\_SR
- BC\_SR
- TN1\_SR
- AB3\_SR
- MT1\_SR
- TN1\_SR
- MT1\_SR
- OR\_ST
- MN\_ST
- TN2\_ST
- AB1\_ST
- MT2\_ST
- MB\_ST
- MN\_ST
- MT2\_ST
- AB1\_ST
- ND\_ST
- PEI\_ST
- PEI\_ST
- BC\_ST
- BC\_ST
- NY\_ST
- PEI\_ST
- MN\_ST
- OR\_ST
- AB3\_ST
- AB3\_ST
- TN1\_ST
- AB3\_ST
- AB3\_ST
- ND\_ST
- ID\_ST
- TN2\_ST
- BC\_ST
- TN1\_ST
- MT1\_ST
- MT1\_SR
- ID\_SR
- ID\_SR
- BC\_SR
- AB3\_SR
- MN\_SR
- BC\_SR
- OR\_SR
- NY\_SR
- MN\_SR
- TN2\_SR
- NY\_SR
- ND\_SR

esc

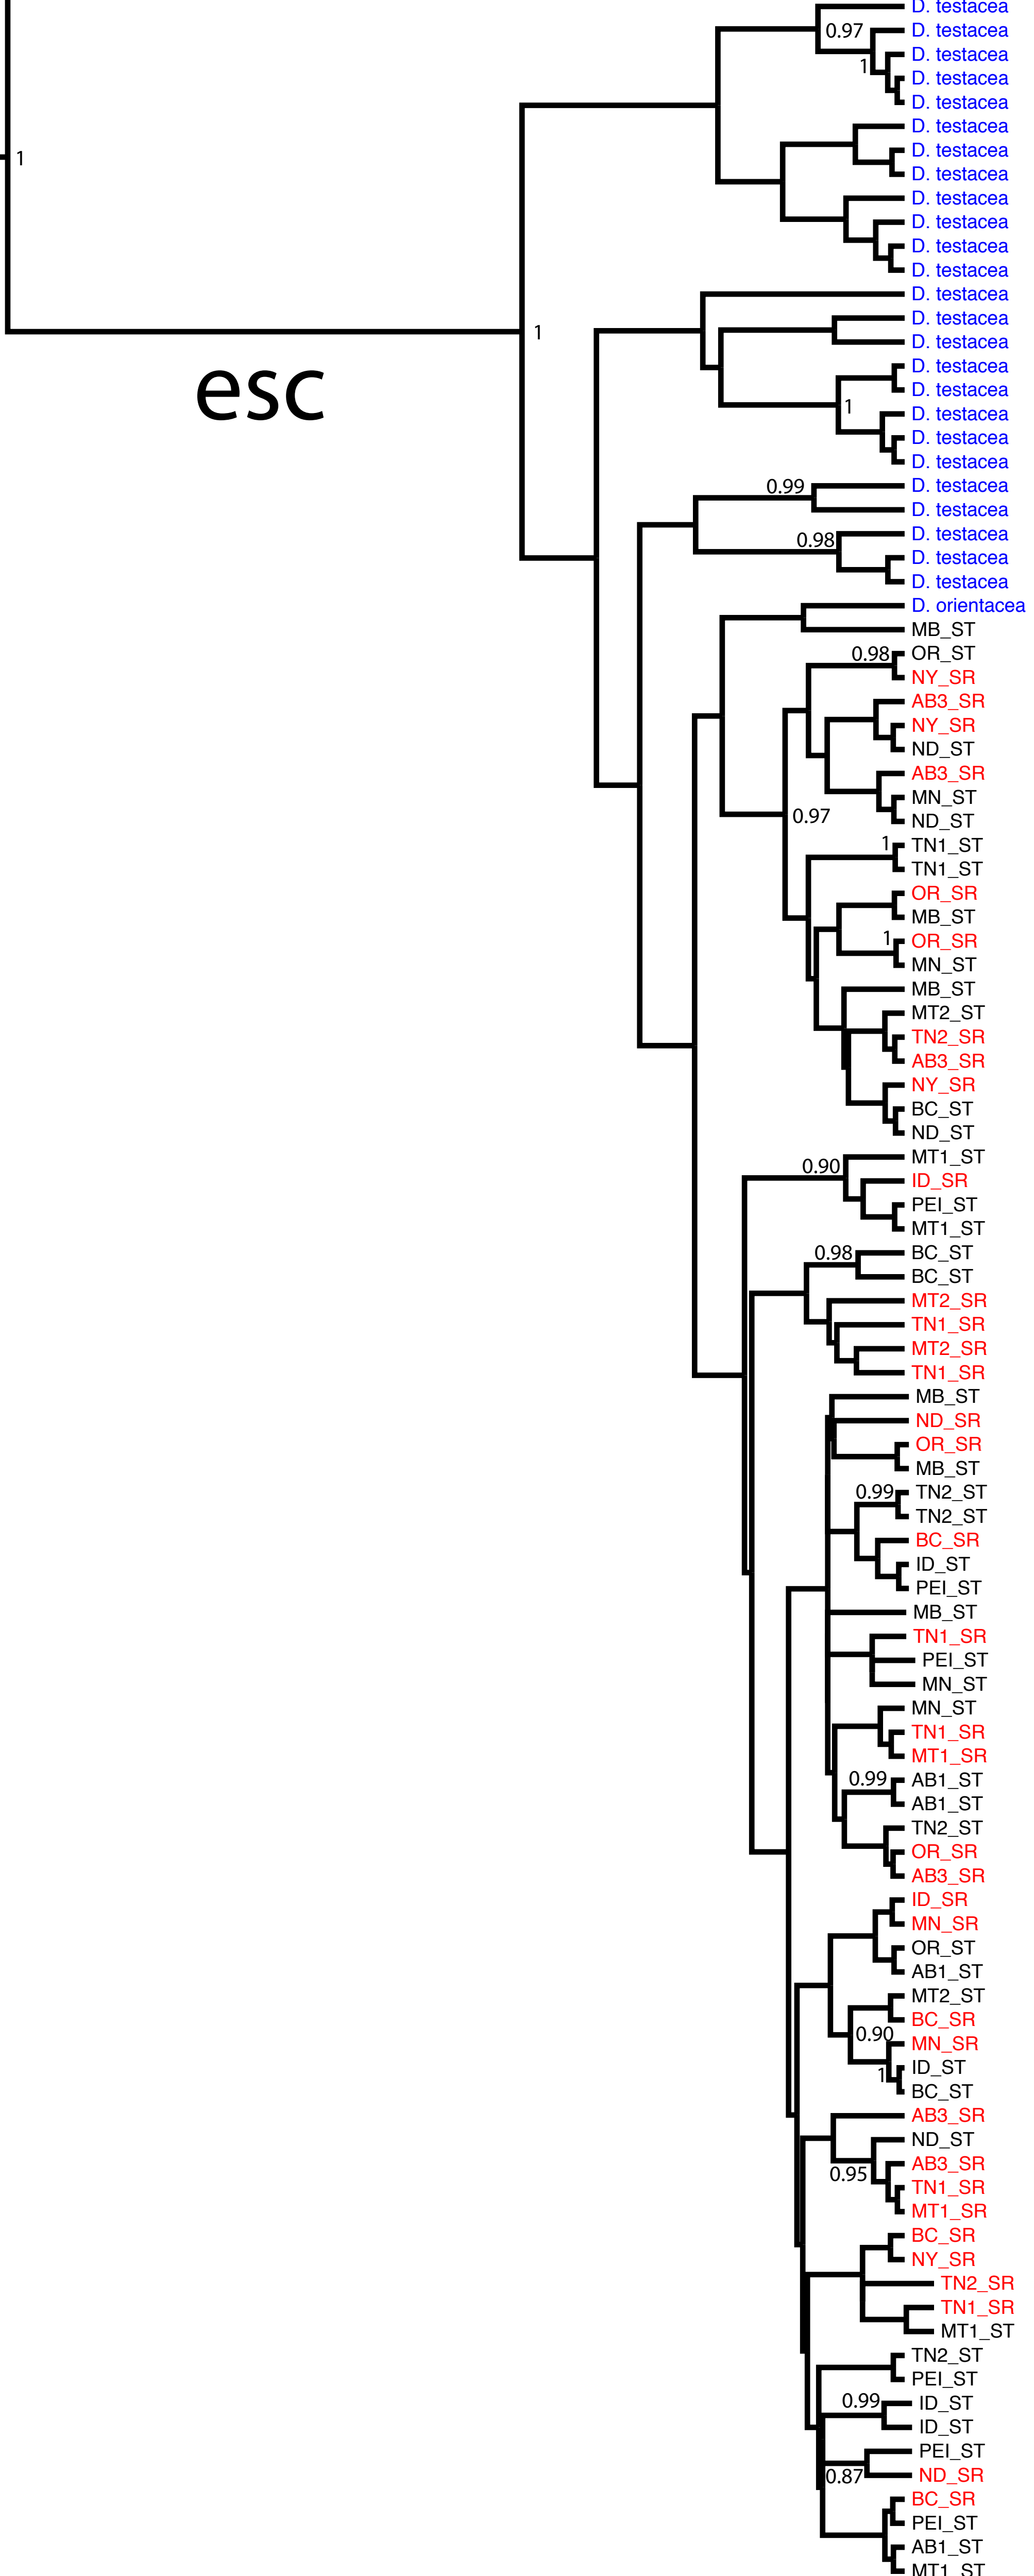

D. putrida

gl

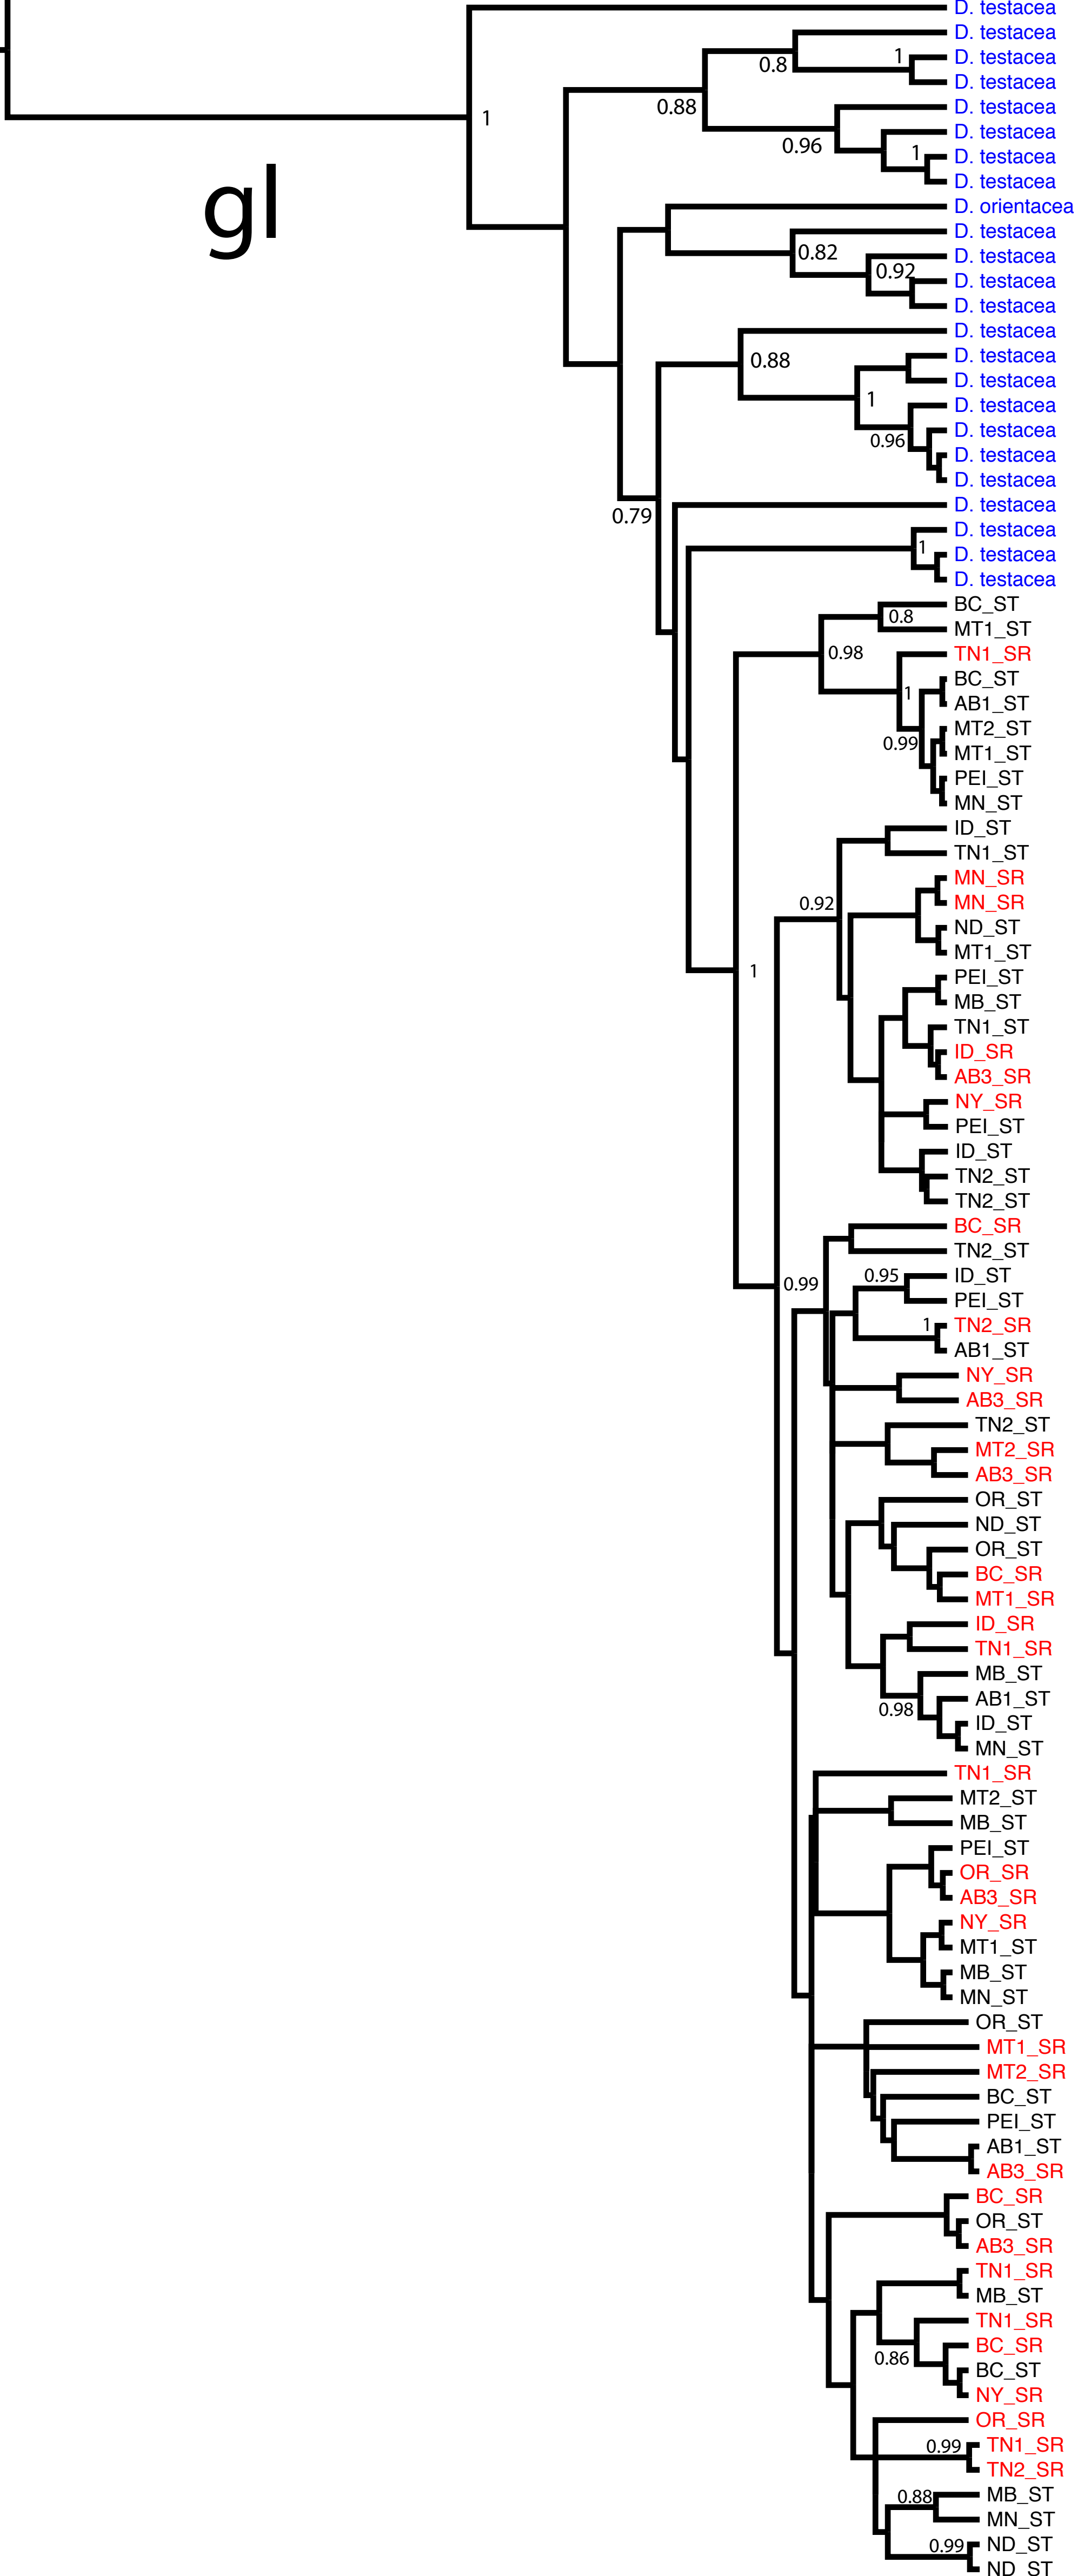



*D. putrida*

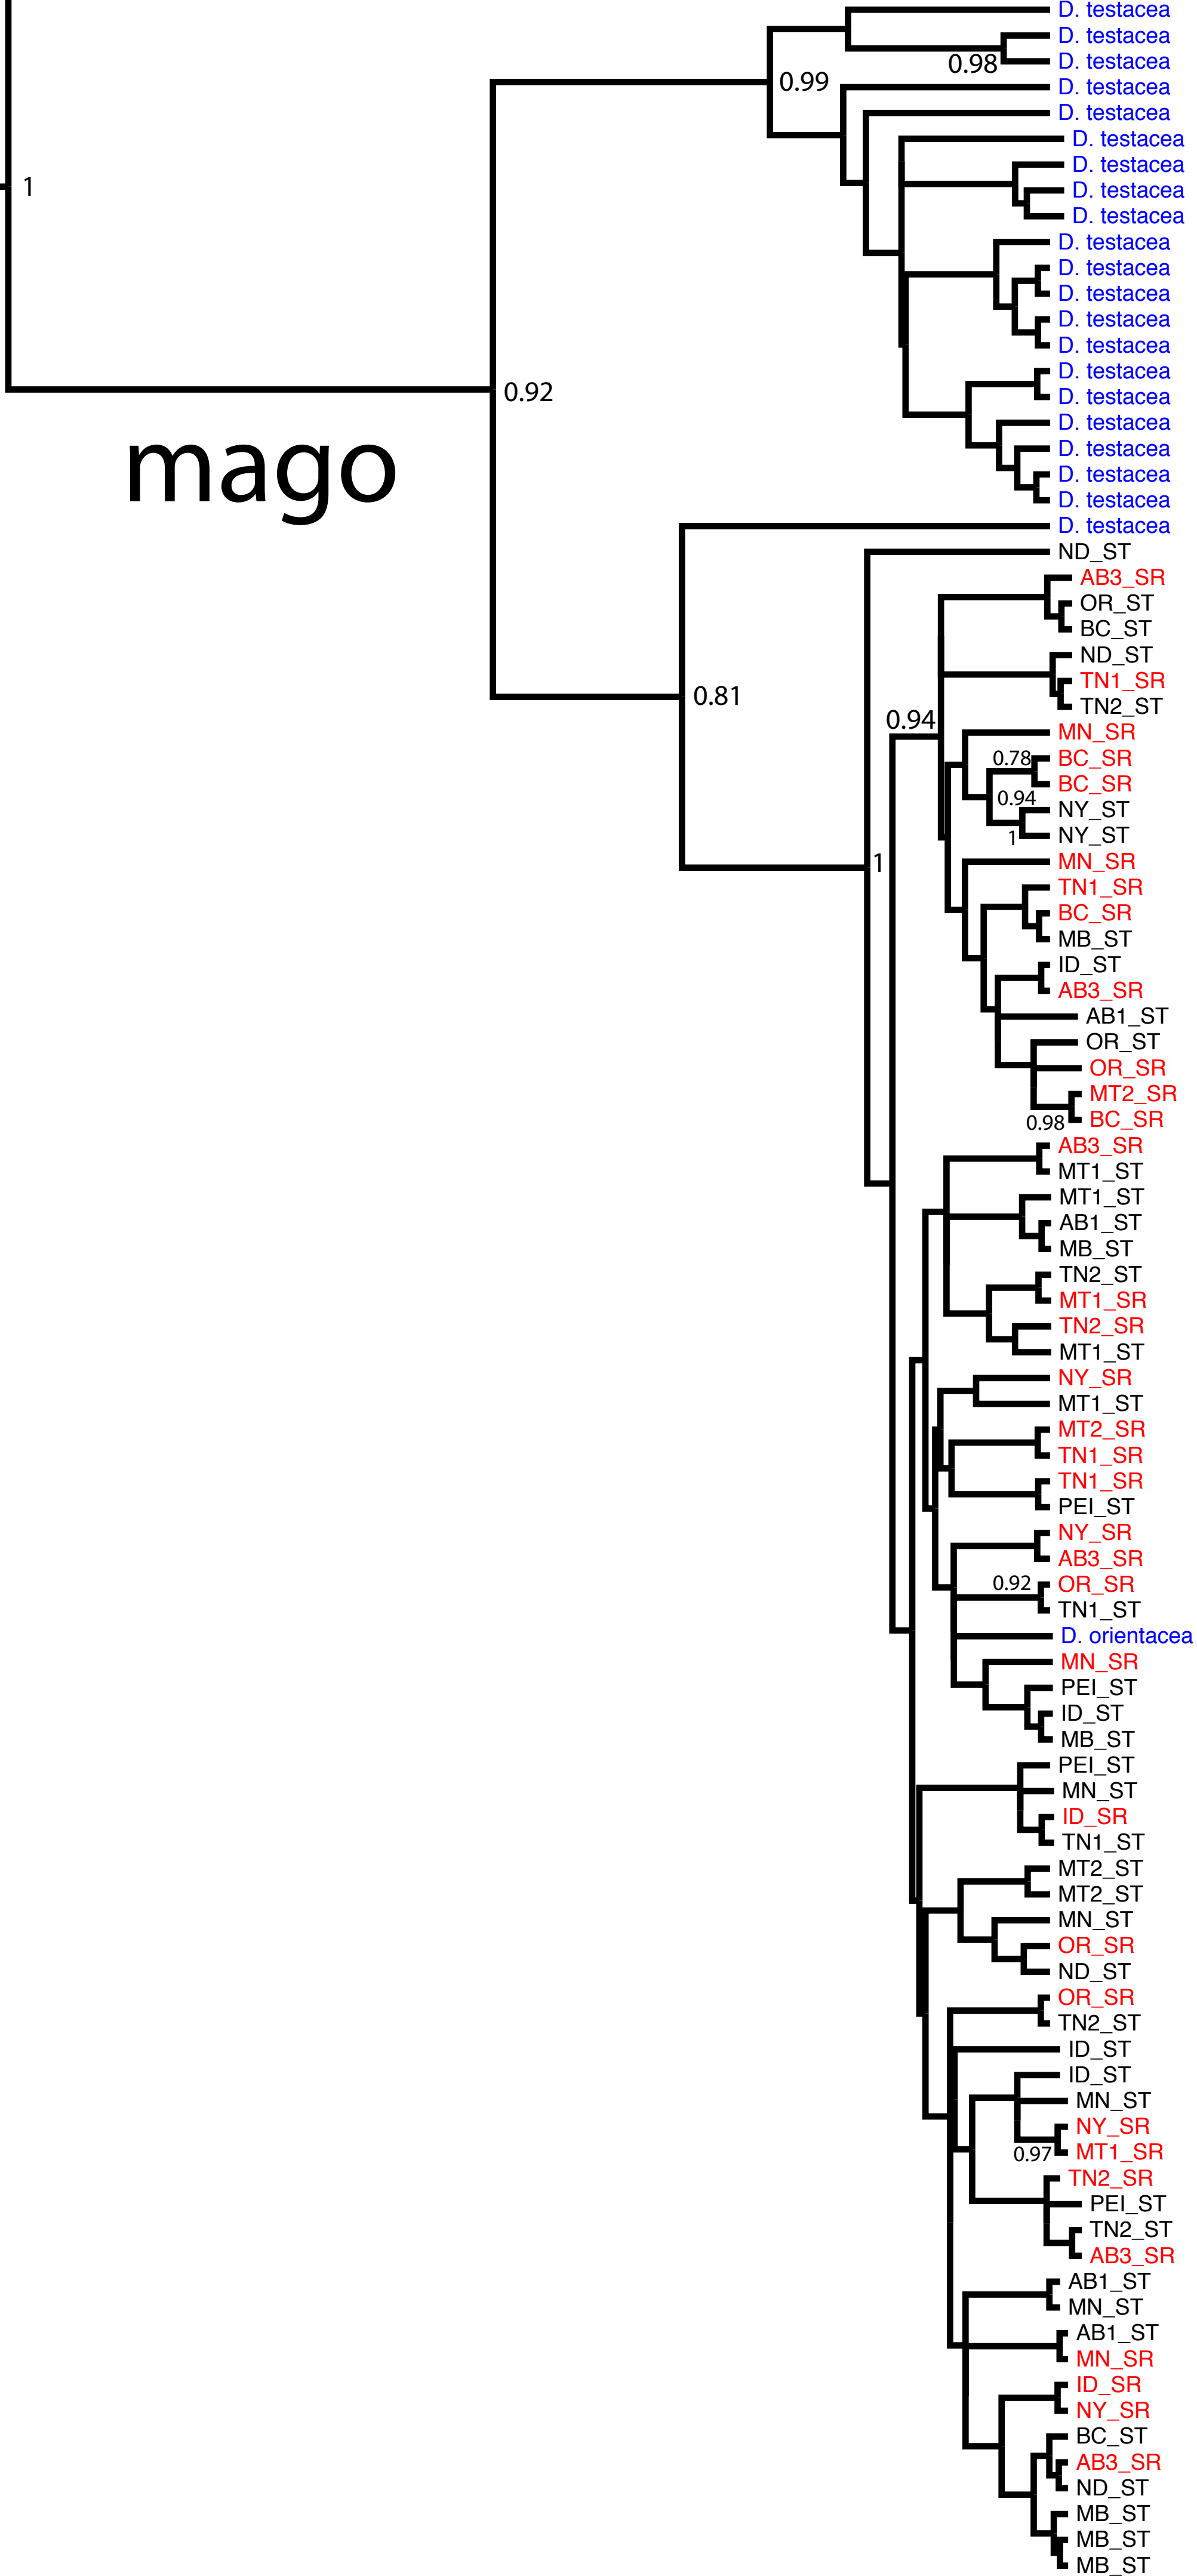



D. putrida

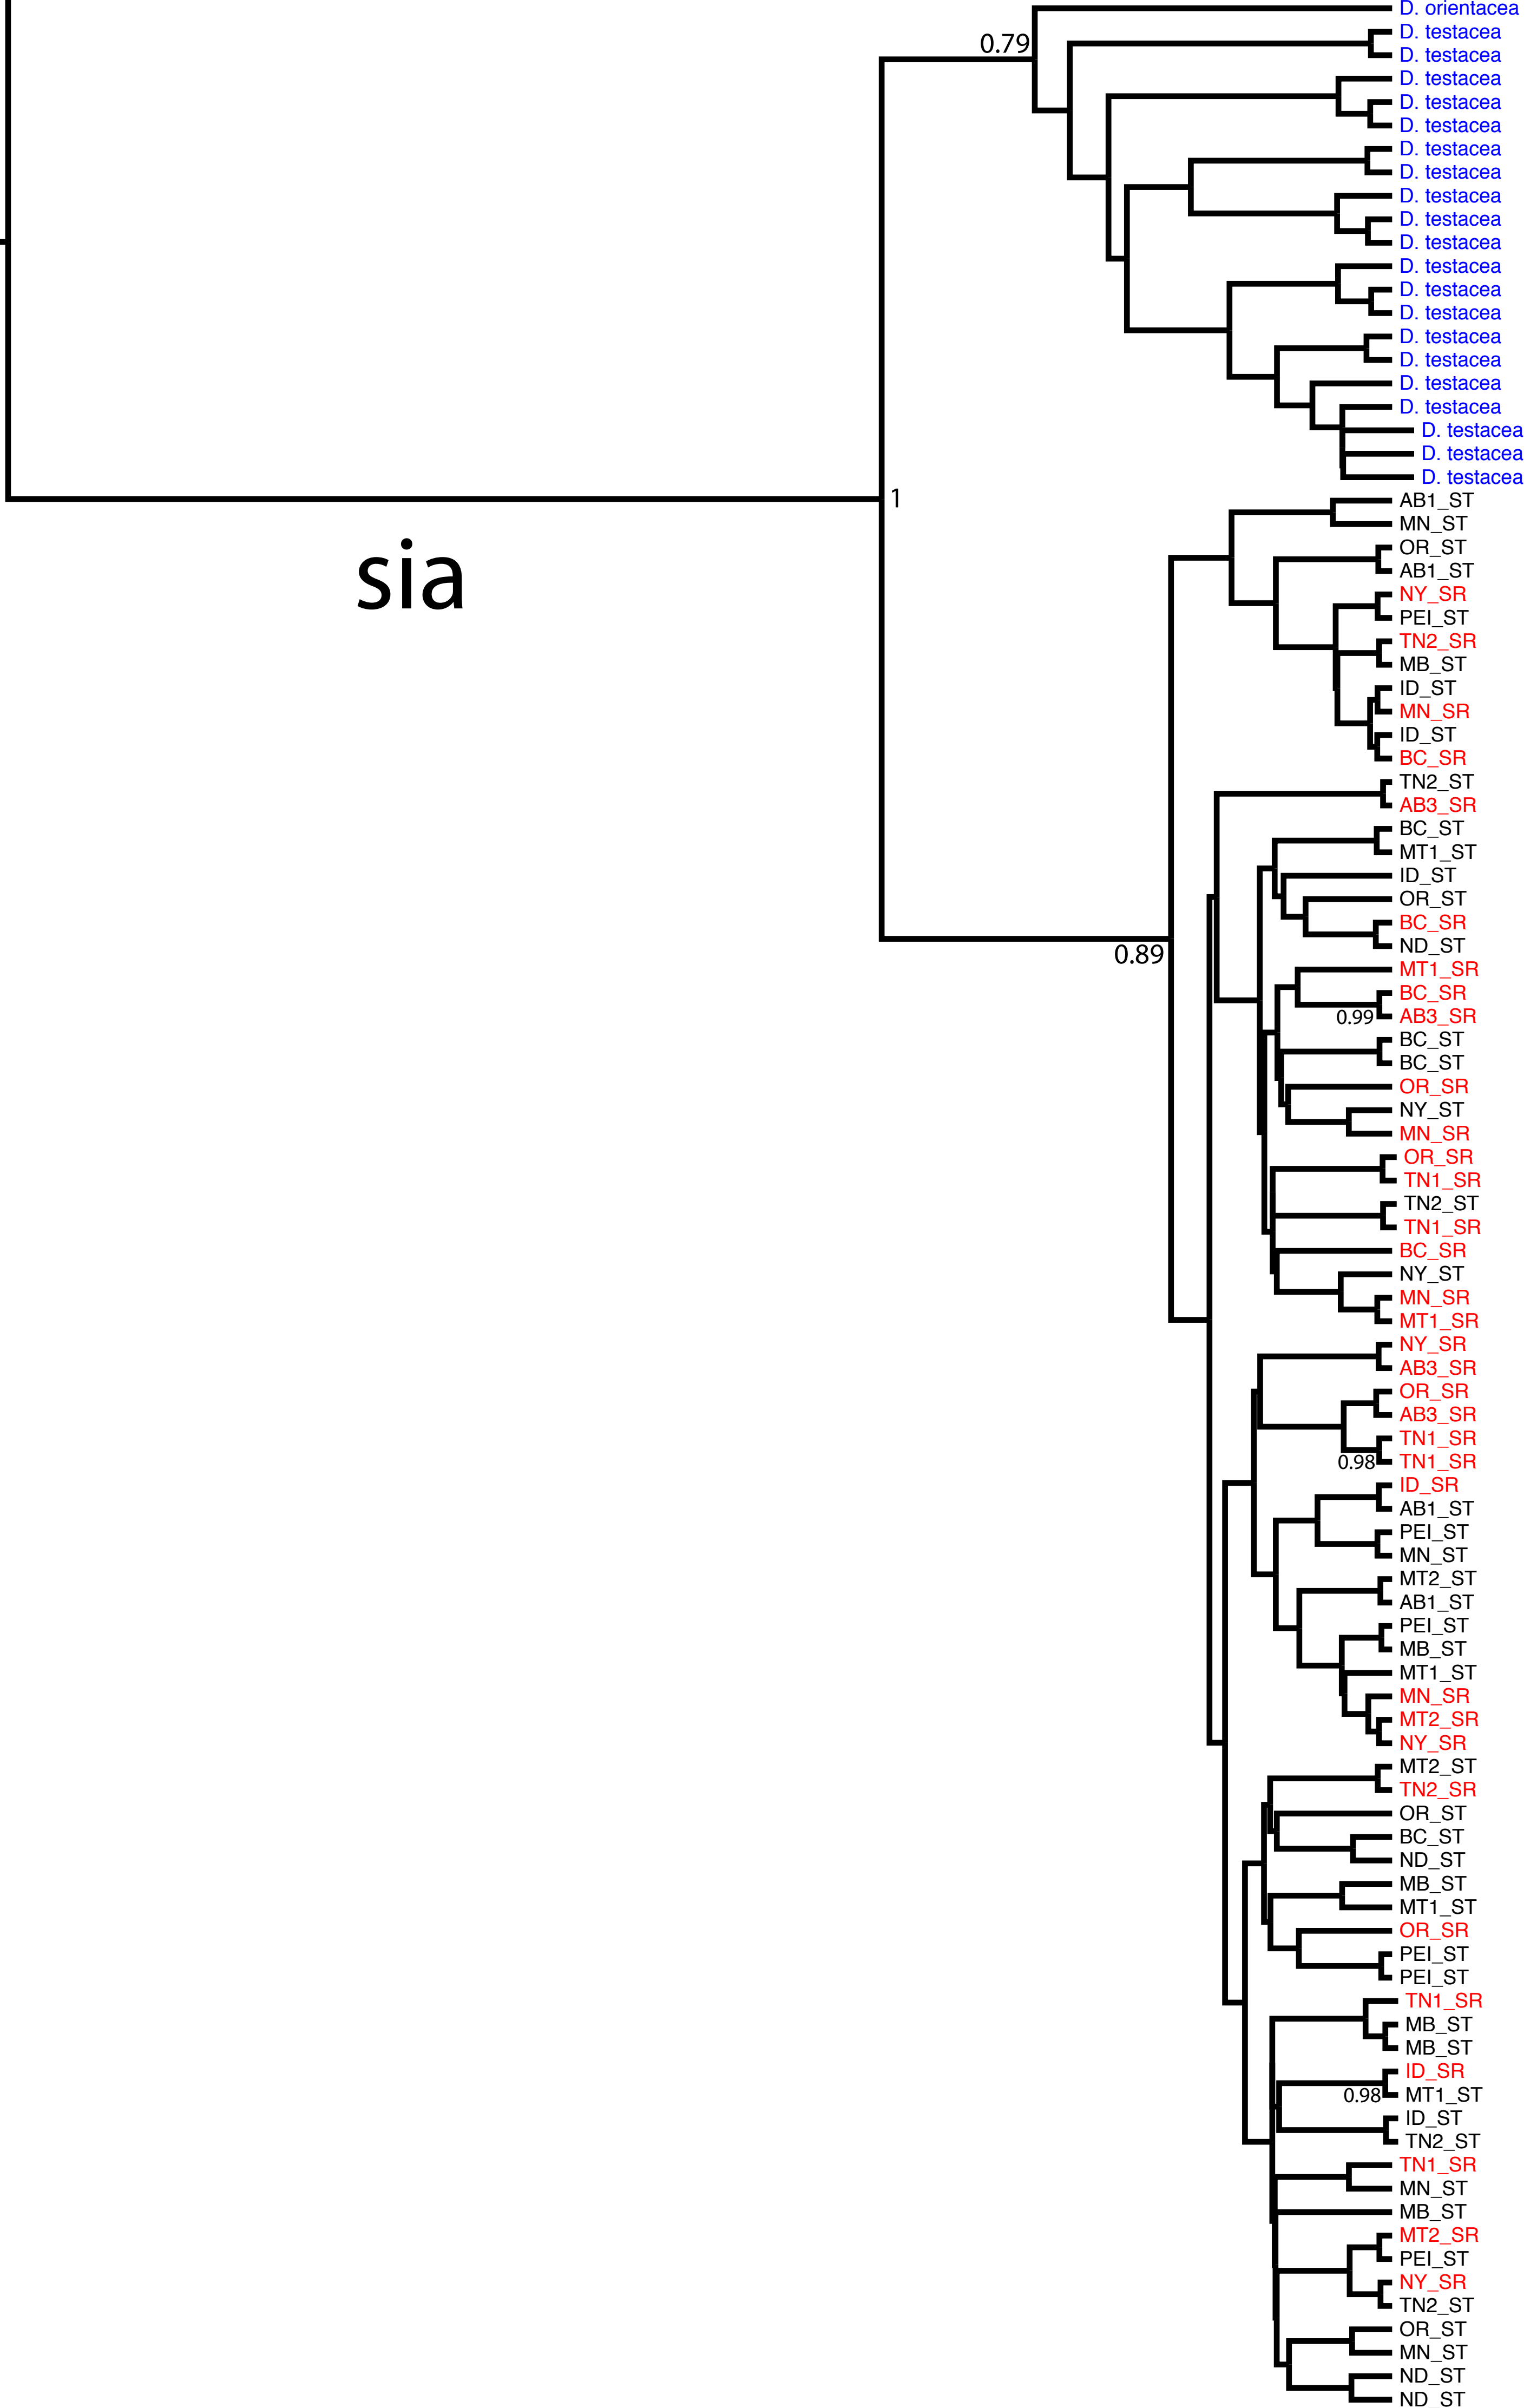

sia

0.79

1

0.89

0.99

0.98

0.98

- D. orientacea
- D. testacea
- AB1\_ST
- MN\_ST
- OR\_ST
- AB1\_ST
- NY\_SR
- PEI\_ST
- TN2\_SR
- MB\_ST
- ID\_ST
- MN\_SR
- ID\_ST
- BC\_SR
- TN2\_ST
- AB3\_SR
- BC\_ST
- MT1\_ST
- ID\_ST
- OR\_ST
- BC\_SR
- ND\_ST
- MT1\_SR
- BC\_SR
- AB3\_SR
- BC\_ST
- BC\_ST
- OR\_SR
- NY\_ST
- MN\_SR
- OR\_SR
- TN1\_SR
- TN2\_ST
- TN1\_SR
- BC\_SR
- NY\_ST
- MN\_SR
- MT1\_SR
- NY\_SR
- AB3\_SR
- OR\_SR
- AB3\_SR
- TN1\_SR
- TN1\_SR
- ID\_SR
- AB1\_ST
- PEI\_ST
- MN\_ST
- MT2\_ST
- AB1\_ST
- PEI\_ST
- MB\_ST
- MT1\_ST
- MN\_SR
- MT2\_SR
- NY\_SR
- MT2\_ST
- TN2\_SR
- OR\_ST
- BC\_ST
- ND\_ST
- MB\_ST
- MT1\_ST
- OR\_SR
- PEI\_ST
- PEI\_ST
- TN1\_SR
- MB\_ST
- MB\_ST
- ID\_SR
- MT1\_ST
- ID\_ST
- TN2\_ST
- TN1\_SR
- MN\_ST
- MB\_ST
- MT2\_SR
- PEI\_ST
- NY\_SR
- TN2\_ST
- OR\_ST
- MN\_ST
- ND\_ST
- ND\_ST



wee

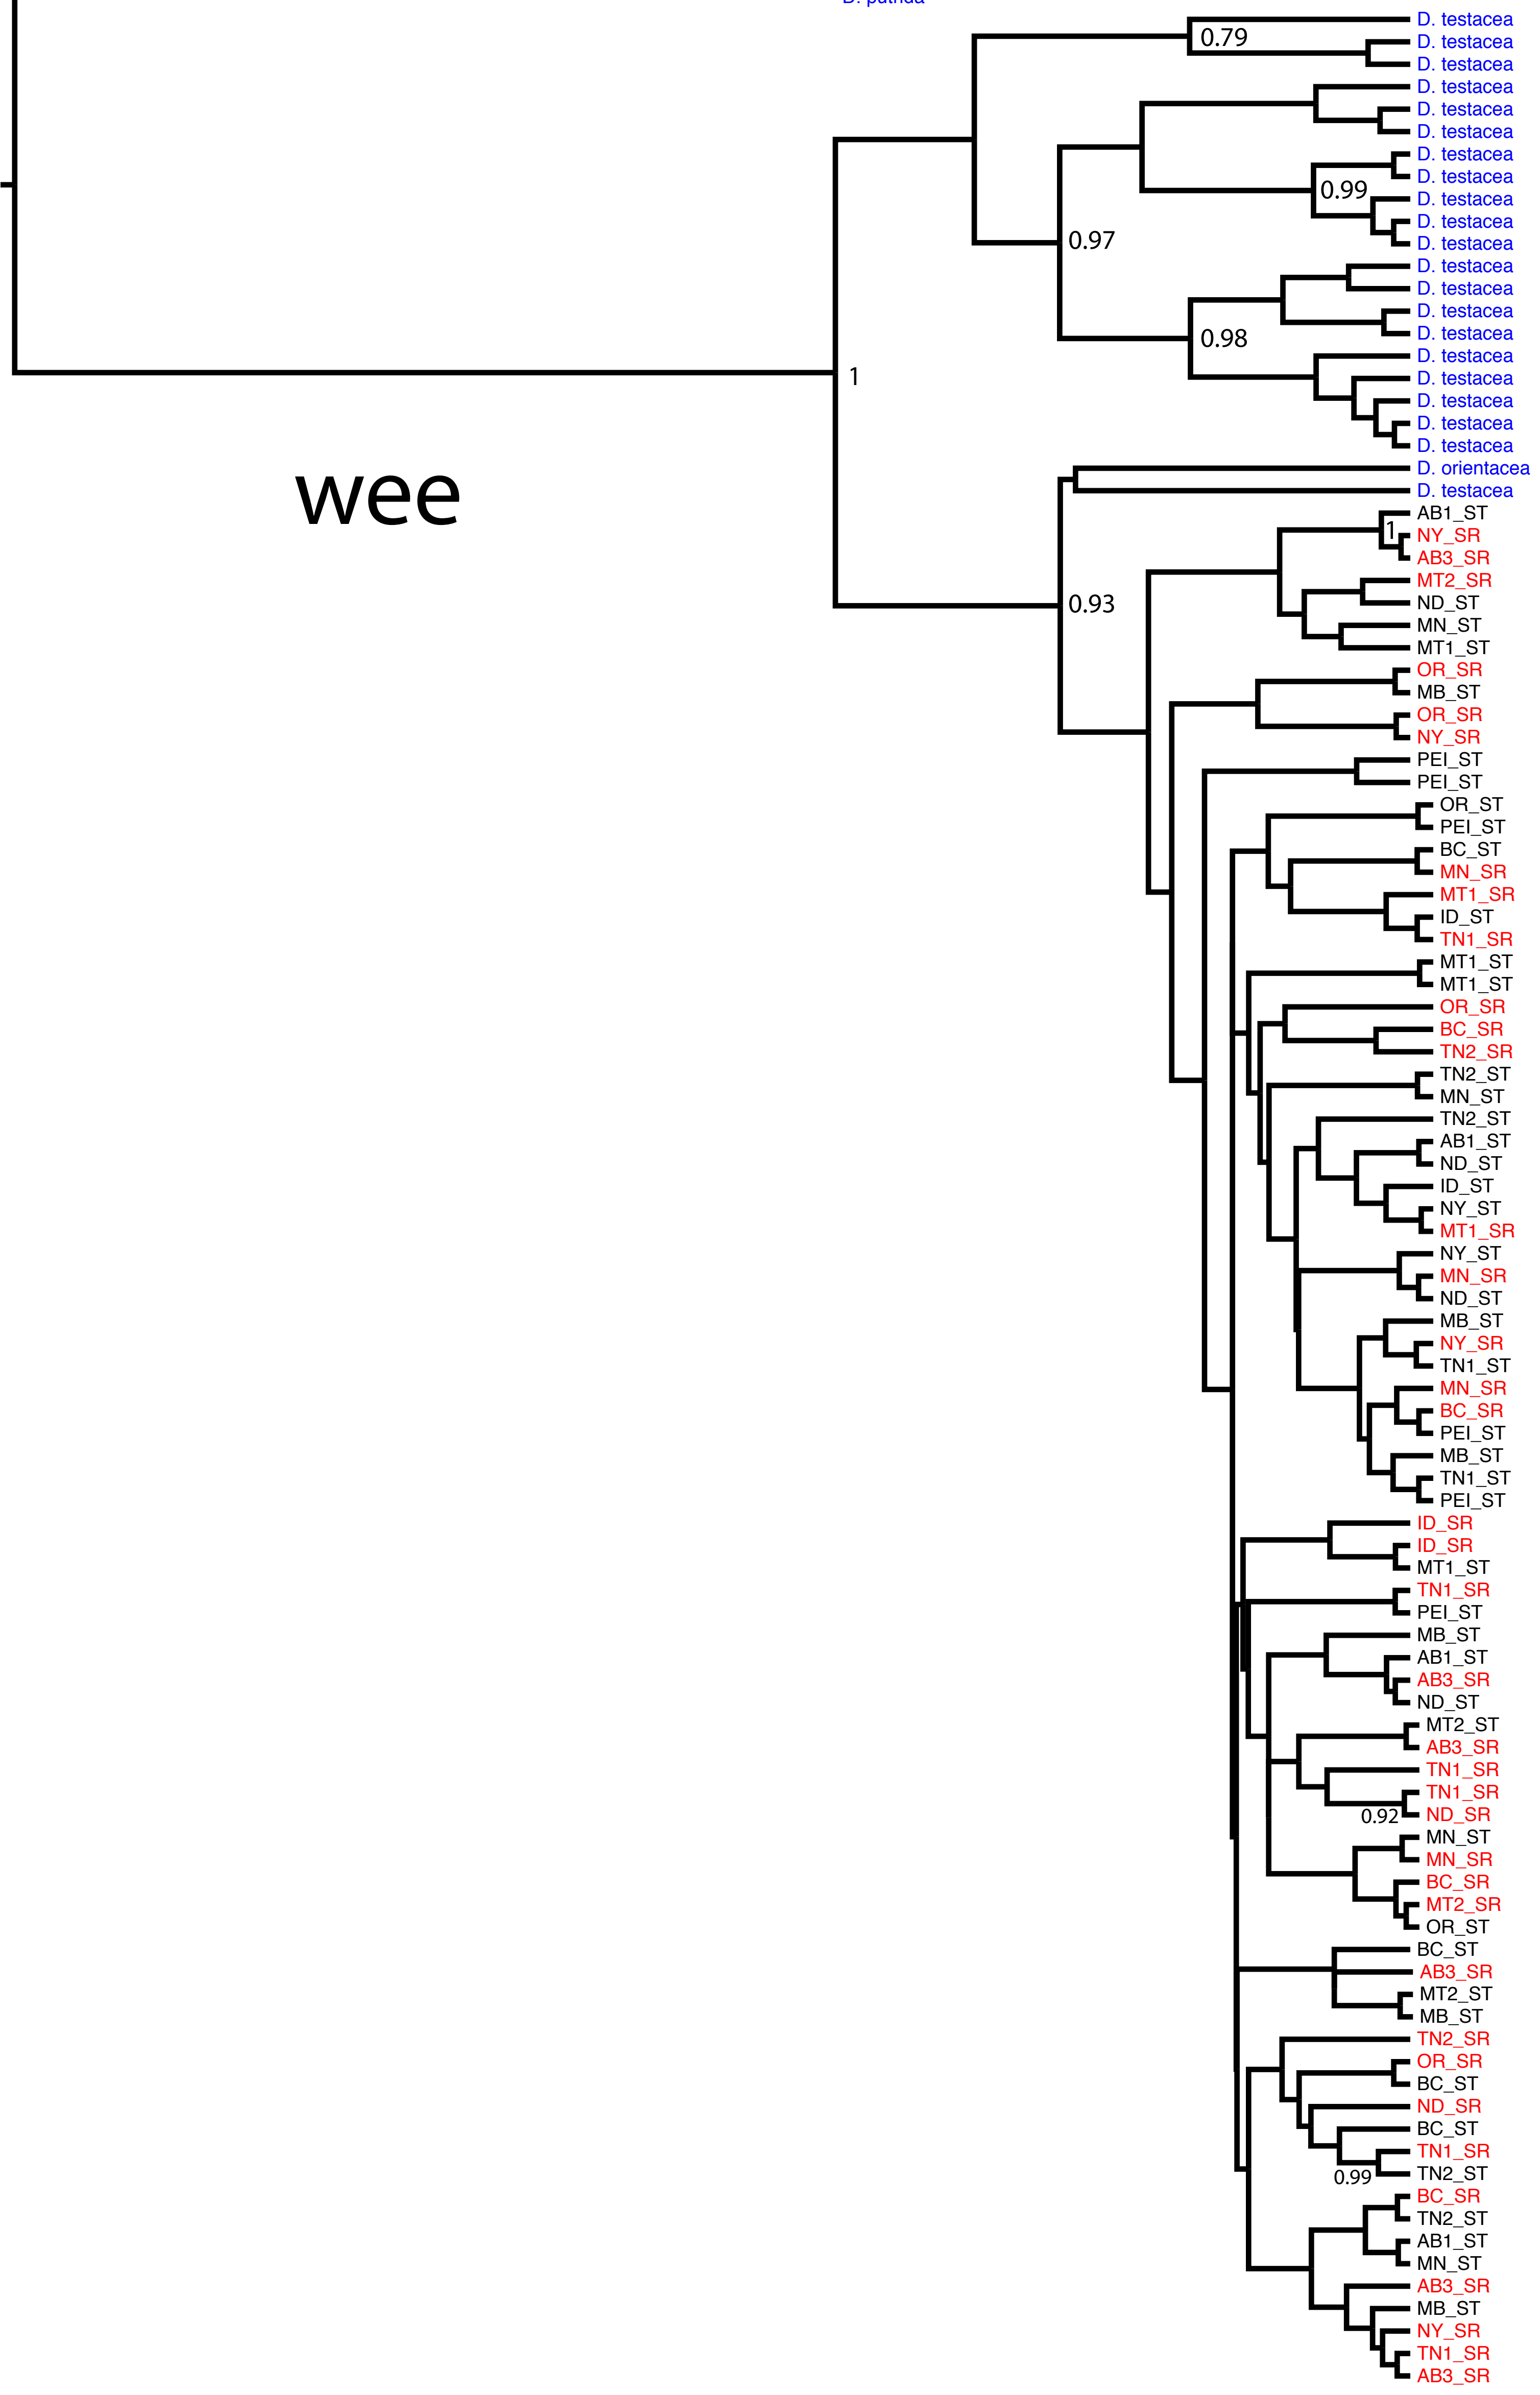

Figure S3. Linkage disequilibrium between SNPs considering ST and ST samples separately. Shown are  $R^2$  values between pairs of SNPs within and between each marker, using parsimony informative sites only. All sites included in the analyses are pictured.  $R^2$  is represented as a heat map, with the lightest grey = 0 and the darkest grey = 1. *mof* and *rpl* were unable to be mapped, have been added to the end of the alignment. Some markers are not represented in the SR-only matrix due to a lack of parsimony informative sites.

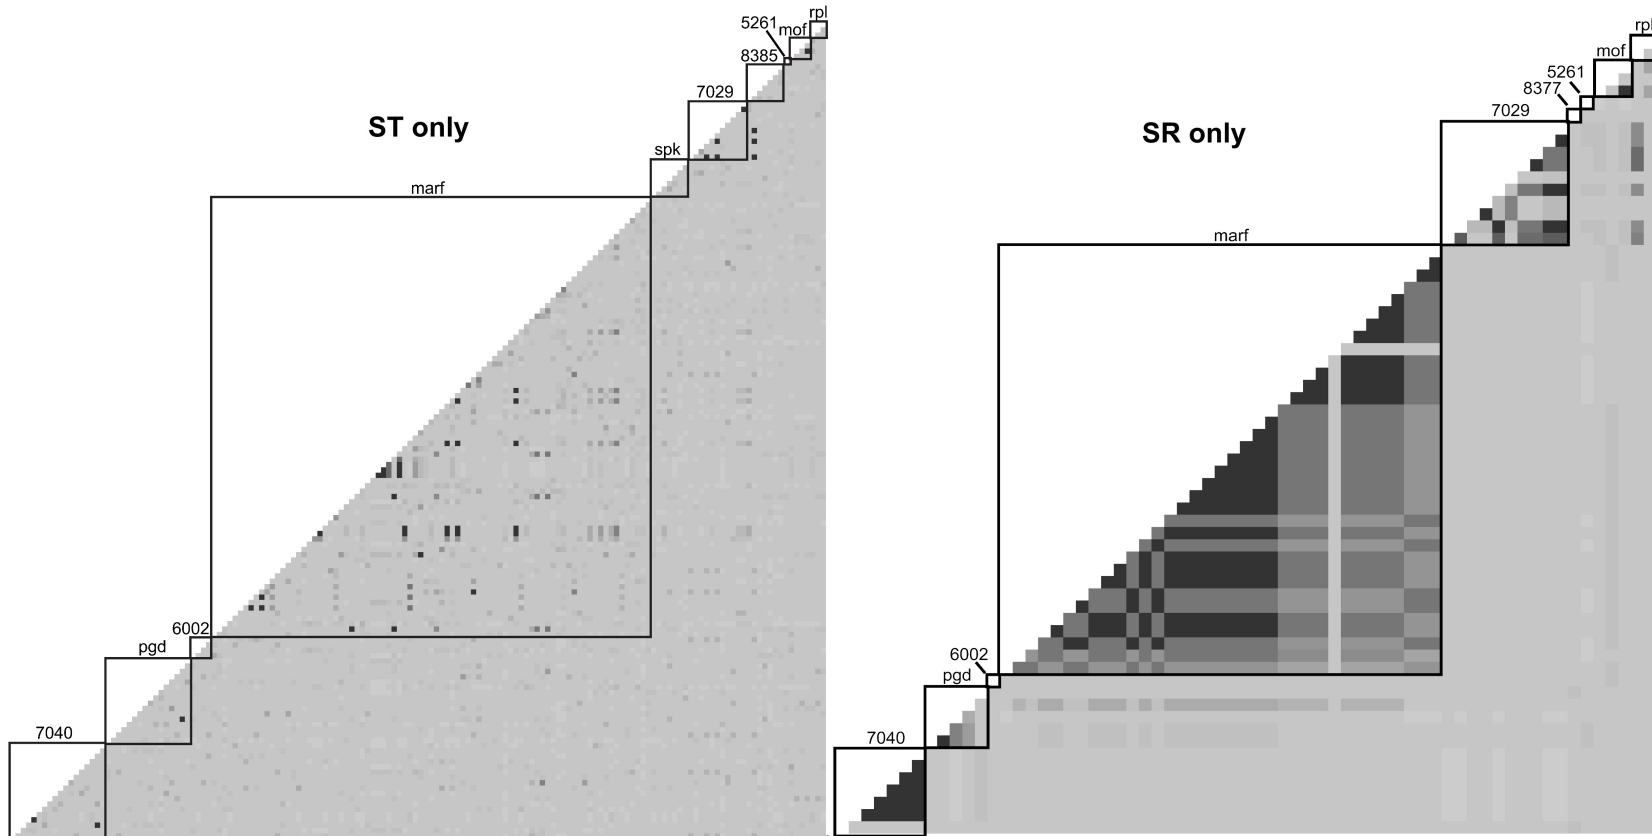

Figure S4. Polymorphism and frequency spectrum estimates for each individual marker, using only silent sites. On the X-chromosome, estimates for ST (filled circles) and SR (open circles) were calculated separately. Estimates for the autosomes (triangles) were calculated using all samples. Panel (a) shows  $\pi$ , panel (b) shows Watterson's  $\theta$ , and panel (c) shows Tajima's D. Markers are presented in their ST map order. mof and rpl were unable to be mapped and have been added to the end.

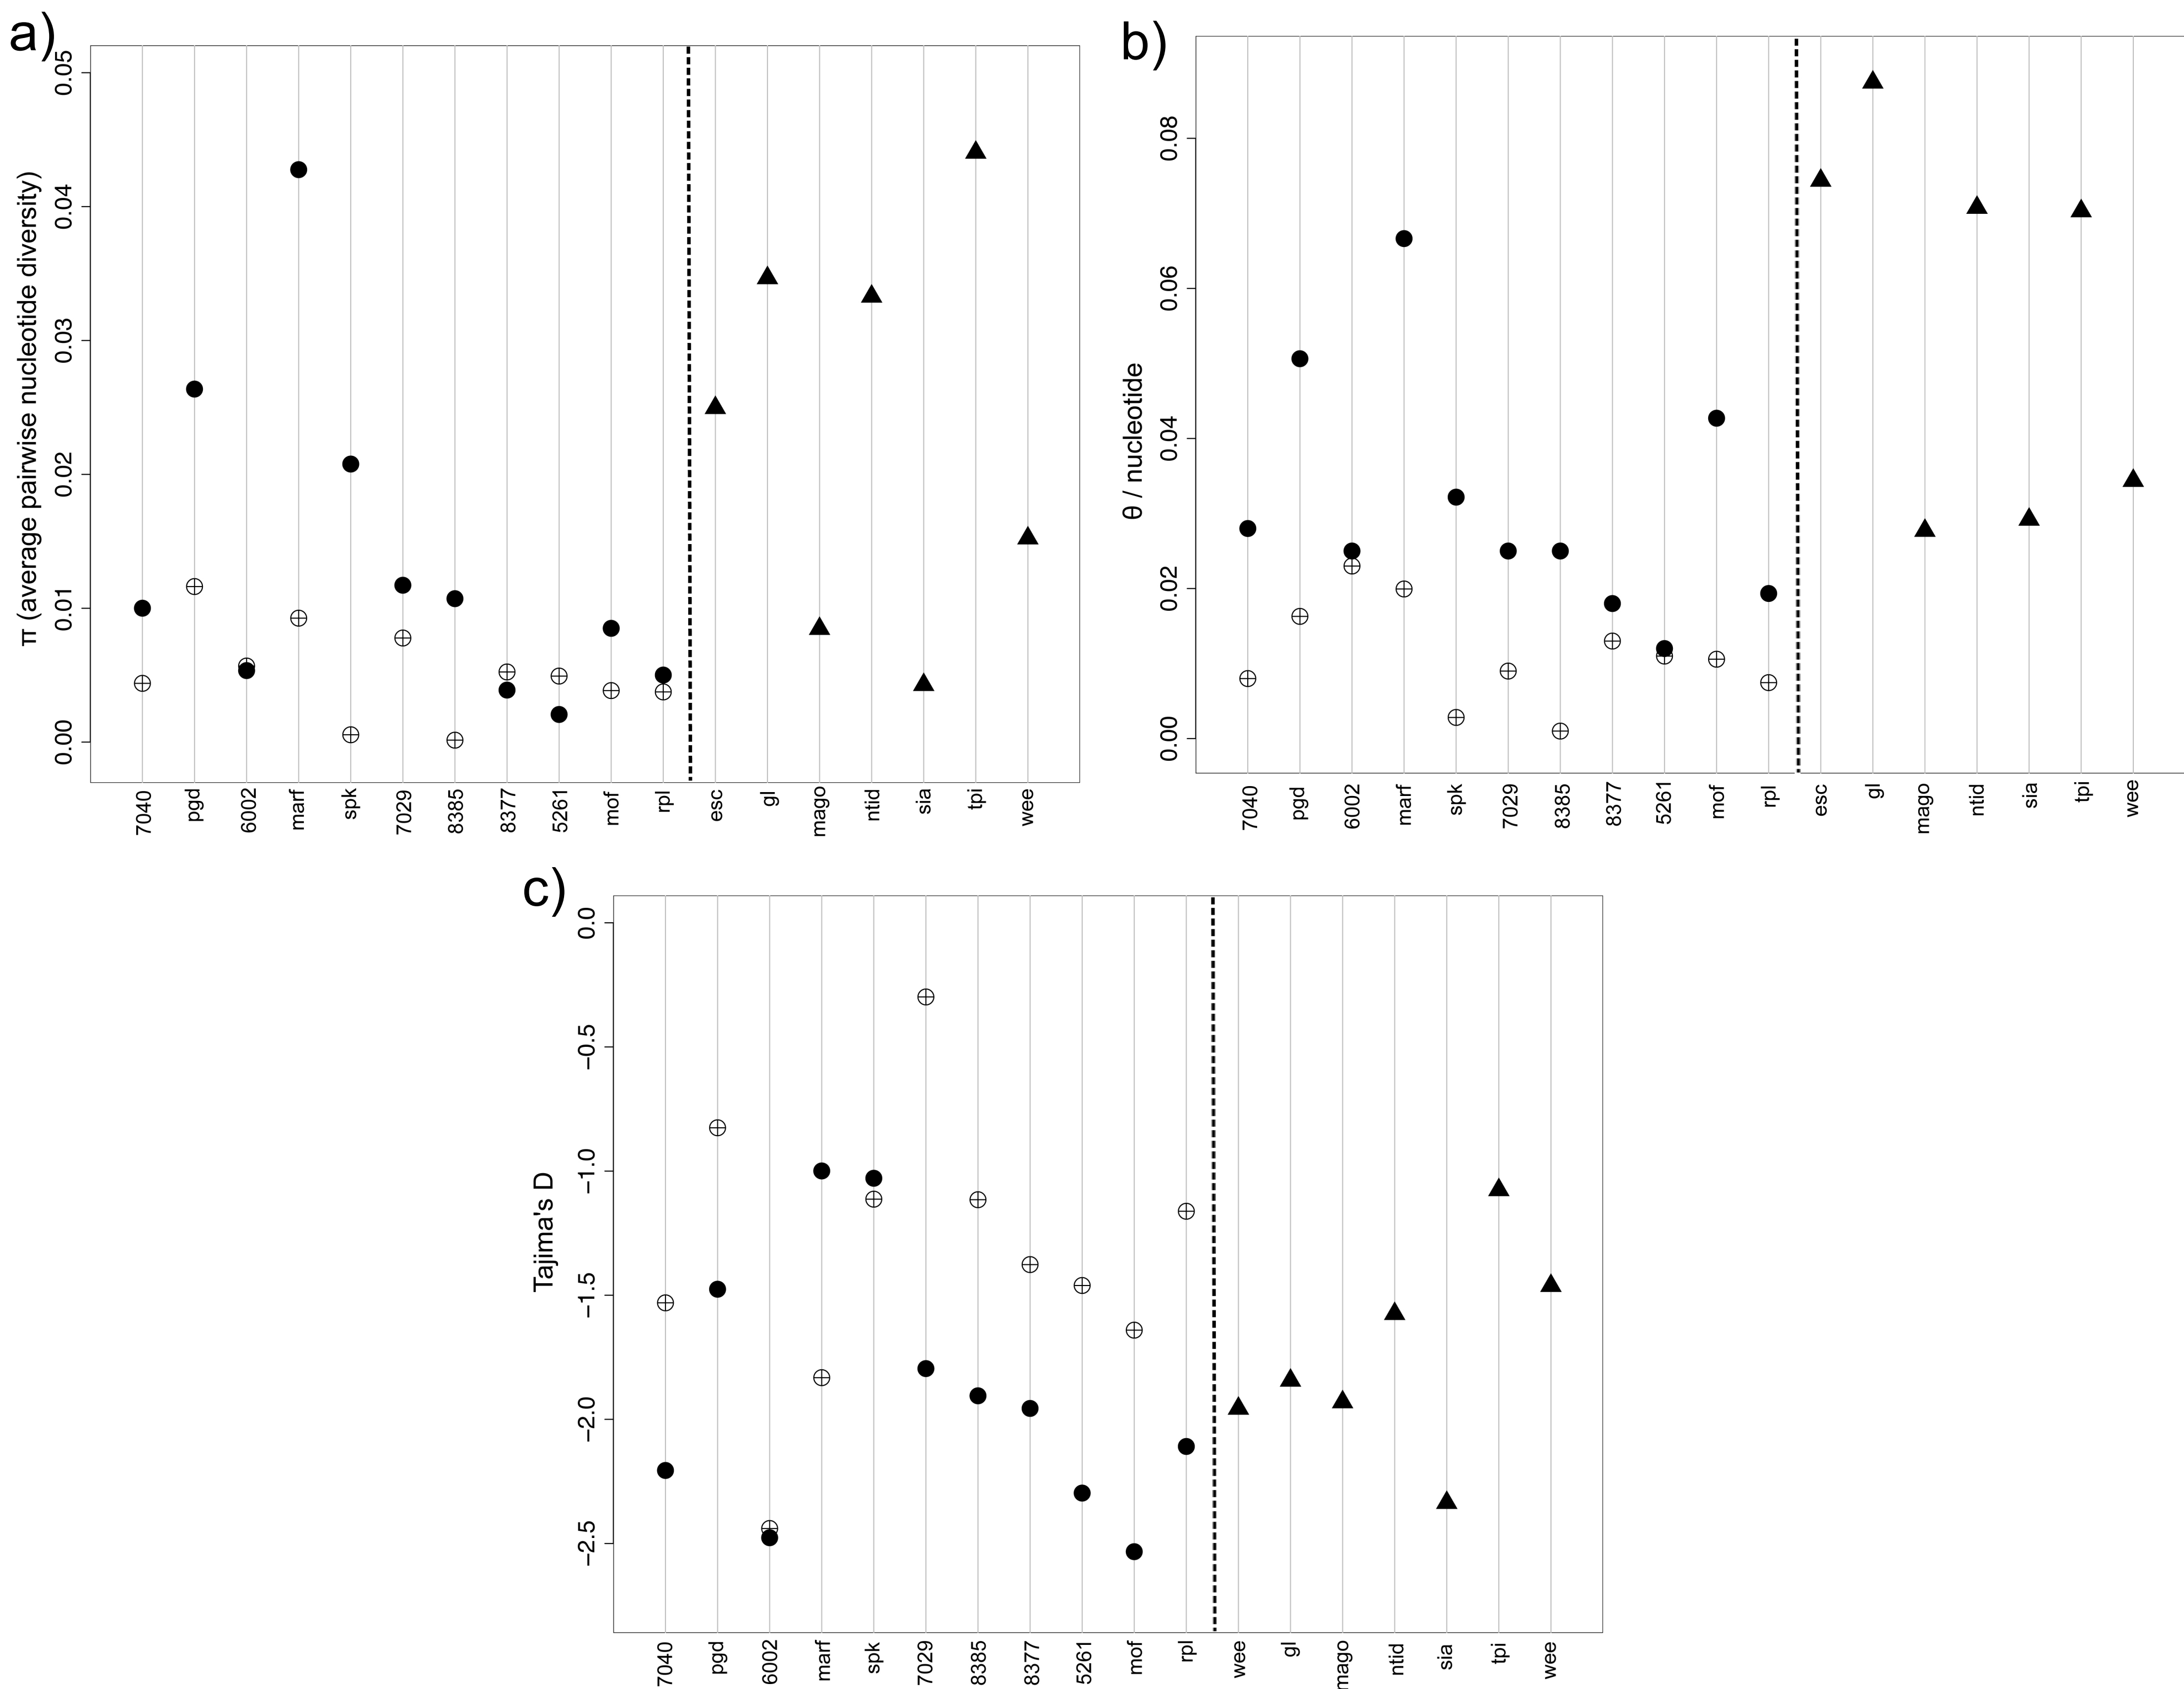



Table S1. All of the populations used in this study, and the number of unique ST and SR males sampled from each. Not all individuals were sequenced at all loci. A subset of individuals random with respect to X-chromosome status was chosen for sequencing at autosomal loci.

| <b>Population</b> | <b>Collection location</b> | <b>SR samples</b> | <b>ST samples</b> | <b>Autosomal samples</b> |
|-------------------|----------------------------|-------------------|-------------------|--------------------------|
| <b>AB1</b>        | Winston Churchill, AB      | 0                 | 4                 | 2                        |
| <b>AB3</b>        | Jasper, AB                 | 4                 | 4                 | 3                        |
| <b>BC</b>         | Vancouver, BC              | 4                 | 4                 | 4                        |
| <b>ID</b>         | Coeur d'Alene, ID          | 6                 | 8                 | 3                        |
| <b>MB</b>         | The Pas, MB                | 0                 | 4                 | 3                        |
| <b>MN</b>         | Bemidji, MN                | 4                 | 4                 | 4                        |
| <b>MT1</b>        | Columbia Falls, MT         | 5                 | 8                 | 3                        |
| <b>MT2</b>        | St. Regis, MT              | 4                 | 5                 | 3                        |
| <b>ND</b>         | Minot, ND                  | 2                 | 4                 | 3                        |
| <b>NY</b>         | Rochester, NY              | 6                 | 5                 | 3                        |
| <b>OR</b>         | MacKenzie Bridge, OR       | 4                 | 4                 | 4                        |
| <b>PEI</b>        | Charlottetown, PEI         | 0                 | 4                 | 3                        |
| <b>TN1</b>        | Gatlinburg, TN             | 6                 | 3                 | 4                        |
| <b>TN2</b>        | Clingmans Dome, TN         | 3                 | 4                 | 3                        |

Table S2. Molecular population genetic summary statistics for each locus. A) Statistics for *D. neotestacea* samples. S (segregating sites) for total and silent sites is presented. M (mutations),  $\pi$ ,  $\theta$ , and D for silent sites only includes synonymous sites in open reading frames and all noncoding sites.  $\pi$  NS is using nonsynonymous polymorphism only.  $\rho$  is population recombination rate ( $2N_e r$ ) divided by the number of nucleotides in the marker. For the autosomal markers, all statistics were calculated from the combined set of SR and ST individuals.  $\rho$  and ZnS could not be calculated for some markers due to a lack of segregating sites. Bolded D values are less than the expected D in 95% of 10,000 simulations. Da is percent divergence between ST and SR.

|           | Marker  | X-chromosome | N   | Total Sites | S     | Silent sites | M silent | S silent | $\pi$ silent | $\pi$ NS | $\theta$ silent | D silent      | $\rho$ | ZnS   | $\pi_a/\pi_s$ | $K_a/K_s$ | Da     |       |
|-----------|---------|--------------|-----|-------------|-------|--------------|----------|----------|--------------|----------|-----------------|---------------|--------|-------|---------------|-----------|--------|-------|
| X-linked  | neo5261 | ST           | 61  | 183         | 10    | 183          | 10       | 10       | 0.002        |          | 0.012           | <b>-2.297</b> | 0.000  | 0.178 |               |           |        | 0.274 |
|           |         | SR           | 45  |             | 7     |              | 7        | 7        | 0.005        |          | 0.011           | -1.461        | 0.000  | 0.054 |               |           |        |       |
|           | neo6002 | ST           | 57  | 190         | 19    | 190          | 21       | 19       | 0.005        |          | 0.025           | <b>-2.477</b> | 0.300  | 0.035 |               |           |        | 0.388 |
|           |         | SR           | 44  |             | 19    |              | 19       | 19       | 0.006        |          | 0.023           | <b>-2.440</b> | 0.000  | 0.060 |               |           |        |       |
|           | neo7029 | ST           | 57  | 369         | 39    | 369          | 41       | 39       | 0.012        |          | 0.025           | <b>-1.796</b> | 0.081  | 0.036 |               |           |        | 0.722 |
|           |         | SR           | 42  |             | 13    |              | 13       | 13       | 0.008        |          | 0.009           | -0.299        | 0.008  | 0.317 |               |           |        |       |
|           | neo7040 | ST           | 57  | 515         | 56    | 515          | 59       | 56       | 0.010        |          | 0.028           | <b>-2.206</b> | 0.179  | 0.029 |               |           |        | 0.474 |
|           |         | SR           | 43  |             | 18    |              | 18       | 18       | 0.004        |          | 0.008           | <b>-1.531</b> | 0.050  | 0.106 |               |           |        |       |
|           | neo8385 | ST           | 55  | 319         | 32    | 319          | 32       | 32       | 0.011        |          | 0.025           | <b>-1.905</b> | 0.444  | 0.029 |               |           |        | 0.745 |
|           |         | SR           | 44  |             | 1     |              | 1        | 1        | 0.000        |          | 0.001           | -1.115        | 0.000  | NA    |               |           |        |       |
|           | neo8377 | ST           | 56  | 72          | 5     | 72           | 6        | 5        | 0.004        |          | 0.018           | <b>-1.956</b> | 0.266  | 0.000 |               |           |        | 0.993 |
|           |         | SR           | 44  |             | 4     |              | 4        | 4        | 0.005        |          | 0.013           | -1.377        | NA     | 0.502 |               |           |        |       |
|           | marf    | ST           | 57  | 1063        | 186   | 670.34       | 206      | 184      | 0.043        | 0.005    | 0.067           | -0.999        | 0.122  | 0.037 | 0.195         | 0.424     | 1.581  |       |
|           |         | SR           | 48  |             | 73    | 844.49       | 74       | 71       | 0.009        | 0.001    | 0.020           | <b>-1.832</b> | 0.008  | 0.252 | 0.577         | 0.282     |        |       |
|           | mof     | ST           | 65  | 576         | 30    | 128.36       | 26       | 26       | 0.009        | 0.000    | 0.043           | <b>-2.533</b> | 0.000  | 0.041 | 0.044         | 0.065     | 0.002  |       |
|           |         | SR           | 47  |             | 7     | 128.34       | 6        | 6        | 0.004        | 0.000    | 0.011           | <b>-1.641</b> | 0.000  | 0.049 | 0.038         | 0.064     |        |       |
|           | pgd     | ST           | 56  | 569         | 38    | 128.98       | 30       | 28       | 0.026        | 0.002    | 0.051           | <b>-1.476</b> | 0.146  | 0.023 | 0.064         | 0.069     | -0.010 |       |
|           |         | SR           | 43  |             | 18    | 127.7        | 9        | 9        | 0.012        | 0.001    | 0.016           | <b>-0.826</b> | 0.000  | 0.284 | 0.092         | 0.068     |        |       |
|           | rpl     | ST           | 57  | 302         | 11    | 123.33       | 11       | 11       | 0.005        | 0.000    | 0.019           | <b>-2.109</b> | 0.024  | 0.051 | 0.00          | 0.00      | 0.008  |       |
|           |         | SR           | 44  |             | 4     | 123.33       | 4        | 4        | 0.004        | 0.000    | 0.007           | -1.162        | 0.066  | 0.004 | 0.00          | 0.000     |        |       |
| spk       | ST      | 56           | 382 | 13          | 81.17 | 12           | 12       | 0.021    | 0.000        | 0.032    | -1.029          | 0.298         | 0.015  | 0.006 | 0.021         | 0.041     |        |       |
|           | SR      | 45           |     | 1           | 81.17 | 1            | 1        | 0.001    | 0.000        | 0.003    | -1.113          | NA            | NA     | 0.00  | 0.022         |           |        |       |
| Autosomal | esc     |              | 82  | 370         | 29    | 78.32        | 29       | 27       | 0.025        | 0.001    | 0.074           | <b>-1.956</b> | 0.130  | 0.023 | 0.020         | 0.002     |        |       |
|           | gl      |              | 80  | 402         | 52    | 96.96        | 42       | 39       | 0.035        | 0.002    | 0.087           | <b>-1.843</b> | 0.065  | 0.023 | 0.060         | 0.059     |        |       |
|           | mago    |              | 78  | 324         | 14    | 57.15        | 7        | 7        | 0.010        | 0.001    | 0.025           | <b>-1.429</b> | 0.086  | 0.058 | 0.109         | 0.500     |        |       |
|           | ntid    |              | 88  | 527         | 50    | 123.42       | 44       | 41       | 0.033        | 0.003    | 0.071           | <b>-1.575</b> | 0.068  | 0.027 | 0.138         | 0.110     |        |       |
|           | sia     |              | 82  | 400         | 13    | 96.33        | 14       | 13       | 0.004        | 0.000    | 0.029           | <b>-2.336</b> | 0.000  | 0.015 | 0.024         | 0.084     |        |       |
|           | tpi     |              | 80  | 347         | 33    | 83.28        | 29       | 29       | 0.044        | 0.001    | 0.070           | -1.011        | 0.245  | 0.043 | 0.00          | 0.000     |        |       |
|           | wee     |              | 84  | 285         | 14    | 58.14        | 10       | 10       | 0.015        | 0.001    | 0.034           | <b>-1.462</b> | 0.561  | 0.027 | 0.048         | 0.003     |        |       |

Table S2. Molecular population genetic summary statistics for each locus. B) Statistics for *D. testacea* samples. All analyses included both synonymous and nonsynonymous sites. M is the number of mutations; S is the number of segregating sites. Bolded D values are less than the expected D in 95% of 10,000 simulations.  $\rho$  is population recombination rate ( $2N_e r$ ) divided by the number of nucleotides in the marker.

|           | Marker  | N  | Total sites | M  | S  | $\pi$ | $\theta$ | D             | ZnS   | $\rho$ |
|-----------|---------|----|-------------|----|----|-------|----------|---------------|-------|--------|
| X-linked  | neo5261 | 19 | 175         | 14 | 12 | 0.017 | 0.027    | -1.429        | 0.126 | 0.218  |
|           | neo6002 | 12 | 191         | 6  | 5  | 0.007 | 0.010    | -1.225        | 0.060 | 9.857  |
|           | neo7029 | 21 | 352         | 19 | 19 | 0.010 | 0.017    | -1.621        | 0.056 | NA     |
|           | neo7040 | 16 | 513         | 28 | 27 | 0.012 | 0.017    | -1.264        | 0.073 | 3.264  |
|           | neo8377 | 21 | 72          | 3  | 3  | 0.016 | 0.017    | -0.137        | 0.061 | NA     |
|           | neo8385 | 21 | 312         | 9  | 7  | 0.004 | 0.009    | <b>-2.018</b> | 0.004 | NA     |
|           | marf    | 20 | 244         | 7  | 7  | 0.004 | 0.008    | -1.692        | 0.177 | 0.002  |
|           | mof     | 23 | 575         | 17 | 15 | 0.006 | 0.007    | -1.063        | 0.104 | 0.114  |
|           | pgd     | 16 | 560         | 27 | 26 | 0.010 | 0.014    | -1.420        | 0.192 | 0.017  |
|           | rpl     | 18 | 269         | 9  | 9  | 0.005 | 0.010    | -1.561        | 0.140 | 0.024  |
|           | spk     | 22 | 382         | 11 | 11 | 0.004 | 0.008    | -1.768        | 0.193 | 0.009  |
| Autosomal | esc     | 25 | 369         | 13 | 12 | 0.006 | 0.009    | -1.197        | 0.072 | 0.859  |
|           | gl      | 23 | 402         | 29 | 27 | 0.017 | 0.018    | -0.551        | 0.103 | 0.189  |
|           | mago    | 21 | 326         | 6  | 5  | 0.003 | 0.005    | -1.778        | 0.003 | NA     |
|           | ntid    | 28 | 407         | 29 | 29 | 0.009 | 0.009    | <b>-1.823</b> | 0.116 | 0.012  |
|           | sia     | 20 | 399         | 2  | 2  | 0.001 | 0.001    | -1.513        | 0.003 | NA     |
|           | tpi     | 23 | 347         | 13 | 13 | 0.006 | 0.010    | -1.499        | 0.088 | 0.140  |
|           | wee     | 21 | 285         | 9  | 9  | 0.008 | 0.009    | -0.461        | 0.115 | 0.186  |

Tables S3. Forward and reverse PCR primers used to amplify sequences for each marker. All primers are presented in 5' to 3' orientation.

| Marker         | Primer | Sequence                         |
|----------------|--------|----------------------------------|
| <b>neo5261</b> | F      | GAAGCAACAACAAAAGCC               |
|                | R      | AATGAGGCAAGGTCCCCTG              |
| <b>neo6002</b> | F      | TCTAAATGCACAAATCCCAGC            |
|                | R      | CACGACTGCGTAATACTTCACC           |
| <b>neo7029</b> | F      | AGCACATGGCACAGATGTTAG            |
|                | R      | GAAGGATACAAGAGACGTCAGC           |
| <b>neo7040</b> | F      | CAAACAACAATTGCAACGTG             |
|                | R      | GTGTGCACACATTTCCATAACC           |
| <b>neo8377</b> | F      | TGGACAATTGTTGTGGACTG             |
|                | R      | AACAACATCATTTCGCATTCG            |
| <b>neo8385</b> | F      | AGAGCTTTAATGTGCTGGCA             |
|                | R      | CCCAACTGAAAGTGAATTG              |
| <b>marf</b>    | F      | CCCAACATCTTCATCCTGAACAAYMGNTGGGA |
|                | R      | GCGGACTGGGAGATGCAYTCYTCRAA       |
| <b>mof</b>     | F      | CAGAAGCGRCGCTACGA                |
|                | R      | TAKGCCCAATAGCTGCGATA             |
| <b>pgd</b>     | F      | ATYGATGGYGGCAACTC                |
|                | R      | CNCGCATWAGCATRAAKCCYTG           |
| <b>rpl</b>     | F      | CMRVGSCCACAAGACCWCSAARRTC        |
|                | R      | CRTGRGTCTGRGCCTTCC               |
| <b>spk</b>     | F      | AAVATGCCBARYATYAARYTGCARTC       |
|                | R      | CTTCTCCTCRCACCAAYTCRTTC          |
| <b>esc</b>     | F      | GGCCATCAACGAGCTGAARTTYCAYCC      |
|                | R      | TTCCAGCACACGATGGCRTTYTCRCA       |
| <b>gl</b>      | F      | TTTCGATTGCGGCGGNTGYTTYGA         |
|                | R      | GCCGTGGTGCATGGTCATR TTCAT        |
| <b>mago</b>    | F      | CCACAAGGGCAAGTTCGGNCAYGARTT      |
|                | R      | CACTTCAGGTCCTGCACCARRTARTARAA    |
| <b>ntid</b>    | F      | GGGCCGCATCTTCGARCA YAARTGG       |
|                | R      | TGGAGGGGTAGGTGTTCCARCARTA        |
| <b>sia</b>     | F      | TCGAGTGCCCCGTGTGYTTYGAYTA        |
|                | R      | GAAGTGGAAGCCGAAGCAGSWYTGATCAT    |
| <b>tpi</b>     | F      | CAACTGGAAGATGAAYGGIGACC          |
|                | R      | TTCTTGGCATAGGCGCACATYTG          |
| <b>wee</b>     | F      | GCCTGGGCCGAGGAYGAYCAYATG         |
|                | R      | TCACGTGGCCCAGGTCNCCDATYTT        |

Table S4. Genetic differentiation per marker. Significance for  $K_{ST}$  and  $S_{nn}$  were calculated in DnaSP using 1000 randomized permutations. Italics indicate  $p < 0.05$ , bold indicates  $p < 0.01$ , and bold italics indicate  $p < 0.001$ . For the X-linked markers, the number of segregating sites unique to ST/SR and shared between ST and SR are presented.

|                  | Marker  | Geographic $K_{ST}$   | Geo $S_{nn}$          | ST-SR $K_{ST}$      | ST-SR $S_{nn}$        | SR only sites | ST only sites | Shared sites |
|------------------|---------|-----------------------|-----------------------|---------------------|-----------------------|---------------|---------------|--------------|
| <b>X-linked</b>  | neo5261 | 0.0069                | 0.06537               | <b><i>0.286</i></b> | <b><i>0.7624</i></b>  | 6             | 10            | 0            |
|                  | neo6002 | 0.01212               | 0.07205               | <b><i>0.272</i></b> | <b><i>0.84451</i></b> | 10            | 13            | 5            |
|                  | neo7029 | <b><i>0.11563</i></b> | <b><i>0.11476</i></b> | <b><i>0.260</i></b> | <b><i>0.82035</i></b> | 4             | 28            | 9            |
|                  | neo7040 | -0.02985              | 0.06235               | <b><i>0.265</i></b> | <b><i>0.95568</i></b> | 7             | 51            | 11           |
|                  | neo8377 | 0.01795               | 0.07495               | <b><i>0.524</i></b> | <b><i>0.86763</i></b> | 3             | 3             | 1            |
|                  | neo8385 | 0.00955               | 0.07416               | <b><i>0.381</i></b> | <b><i>0.95946</i></b> | 0             | 31            | 0            |
|                  | marf    | 0.02777               | 0.08879               | <b><i>0.249</i></b> | <b><i>0.97087</i></b> | 29            | 155           | 41           |
|                  | mof     | <i>0.02616</i>        | <b><i>0.10742</i></b> | <i>0.007</i>        | <b><i>0.55057</i></b> | 4             | 24            | 2            |
|                  | pgd     | -0.01186              | 0.09386               | <b><i>0.169</i></b> | <b><i>0.93777</i></b> | 11            | 29            | 7            |
|                  | rpl     | <b><i>0.04427</i></b> | 0.08124               | <b><i>0.022</i></b> | <b><i>0.5894</i></b>  | 3             | 10            | 1            |
|                  | spk     | 0.00158               | 0.06184               | <b><i>0.074</i></b> | <b><i>0.73976</i></b> | 1             | 11            | 0            |
| <b>Autosomal</b> | esc     | <i>0.04437</i>        | <b><i>0.16071</i></b> | -0.003              | 0.50313               |               |               |              |
|                  | gl      | -0.02099              | 0.06884               | 0.005               | <i>0.59407</i>        |               |               |              |
|                  | mago    | <i>0.0632</i>         | <b><i>0.11973</i></b> | 0.004               | 0.55051               |               |               |              |
|                  | ntid    | -0.01788              | 0.07167               | -0.004              | 0.46653               |               |               |              |
|                  | sia     | 0.01782               | 0.08351               | 0.003               | 0.52953               |               |               |              |
|                  | tpi     | <i>0.05581</i>        | <i>0.11495</i>        | -0.001              | 0.45123               |               |               |              |
|                  | wee     | <i>0.014</i>          | 0.08582               | -0.001              | 0.4705                |               |               |              |

Table S5. Evidence of gene conversion and/or double crossover events between SR and ST. Start and end positions are the nucleotide positions within the concatenated alignment of all X-linked markers, and the start and end loci are which markers contain these positions. The tract length is also within the concatenated alignment.

| <b>Recipient sample</b> | <b>Start position</b> | <b>End position</b> | <b>Tract length (bp)</b> | <b>Source</b> | <b>Recipient</b> | <b>Start marker</b> | <b>End marker</b> |
|-------------------------|-----------------------|---------------------|--------------------------|---------------|------------------|---------------------|-------------------|
| TN2_27 SR               | 45                    | 3435                | 3296                     | ST            | SR               | neo7040             | neo8377           |
| MT2_27 SR               | 121                   | 3435                | 3219                     | ST            | SR               | neo7040             | neo8378           |
| BC_28 SR                | 45                    | 2885                | 2753                     | ST            | SR               | neo7040             | neo7030           |
| OR_6 SR                 | 121                   | 2885                | 2677                     | ST            | SR               | neo7040             | neo7031           |
| OR_27 SR                | 672                   | 2885                | 2144                     | ST            | SR               | pgd                 | neo7032           |
| BC_8 SR                 | 672                   | 2885                | 2144                     | ST            | SR               | pgd                 | neo7033           |
| NY_27 SR                | 672                   | 2224                | 1490                     | ST            | SR               | pgd                 | marf              |
| NY_29 SR                | 330                   | 1829                | 1449                     | ST            | SR               | neo7040             | marf              |
| MN_5 SR                 | 121                   | 1491                | 1344                     | ST            | SR               | neo7040             | marf              |
| AB3_30 SR               | 672                   | 2047                | 1318                     | ST            | SR               | pgd                 | marf              |
| ID_1 SR                 | 121                   | 672                 | 534                      | ST            | SR               | neo7040             | pgd               |
| MT1_30 SR               | 1491                  | 2047                | 508                      | ST            | SR               | marf                | marf              |
| ID_28 SR                | 1491                  | 2047                | 507                      | ST            | SR               | marf                | marf              |
| AB3_27 SR               | 1851                  | 2047                | 175                      | ST            | SR               | marf                | marf              |
| NY_28 SR                | 1152                  | 1164                | 13                       | ST            | SR               | neo6002             | neo6002           |
| MT2_11 ST               | 831                   | 1605                | 753                      | SR            | ST               | pgd                 | marf              |
| MT2_8 ST                | 2761                  | 3435                | 667                      | SR            | ST               | neo7029             | neo8379           |
| MN_2 ST                 | 2168                  | 2761                | 593                      | SR            | ST               | marf                | neo7029           |
| OR_10 ST                | 1152                  | 1605                | 433                      | SR            | ST               | neo6003             | marf              |
| OR_9 ST                 | 1813                  | 2172                | 329                      | SR            | ST               | marf                | marf              |
| MT2_8 ST                | 141                   | 330                 | 184                      | SR            | ST               | neo7040             | neo7040           |
| ID_3 ST                 | 1705                  | 1766                | 62                       | SR            | ST               | marf                | marf              |
| BC_4 ST                 | 1705                  | 1766                | 62                       | SR            | ST               | marf                | marf              |
| PEI_8 ST                | 1764                  | 1813                | 50                       | SR            | ST               | marf                | marf              |
| MT2_10 ST               | 1766                  | 1813                | 48                       | SR            | ST               | marf                | marf              |
| MT2_9 ST                | 1766                  | 1813                | 48                       | SR            | ST               | marf                | marf              |
| MT1_13 ST               | 1766                  | 1813                | 48                       | SR            | ST               | marf                | marf              |
| ND_1 ST                 | 2168                  | 2172                | 5                        | SR            | ST               | marf                | marf              |
| OR_7 ST                 | 1764                  | 1766                | 3                        | SR            | ST               | marf                | marf              |
| NY_4 ST                 | 1764                  | 1766                | 3                        | SR            | ST               | marf                | marf              |
| AB3_1 ST                | 1764                  | 1766                | 3                        | SR            | ST               | marf                | marf              |
| BC_1 ST                 | 1868                  | 1870                | 3                        | SR            | ST               | marf                | marf              |
| AB3_4 ST                | 1868                  | 1870                | 3                        | SR            | ST               | marf                | marf              |
